# Supplementary material for: The Price of the Induced Defense Against Pests: A Meta-Analysis
Source: Front Plant Sci. 2021 Jan 21;11:615122. doi: 10.3389/fpls.2020.615122 (PMC7859116; doi:10.3389/fpls.2020.615122)
Supplement: Supplementary file 2 [file Data_Sheet_2.xlsx]

## Sheet: Legend
Supplementary Dataset 1: Raw data for calculating effect sizes and classification in the different explanatory variables.
Abbreviation	Explanation
nT	Treatment group sample size
nC	Control group sample size
mT	Treatment group mean value
mC	Control group mean value
se1T	Treatment group standard error
se1C	Control group standard error
T-test	t-value of the test
ANOVA	F-value of the ANOVA
g	Hedge's g effect size
g.SE	Stardard error of the effect size
var.g	Variance of the effect size

## Sheet: Data
Study ID	Authors	Year	Plant species	Biotic stress	Parameter	Parameter units	Process	nT	nC	mT	mC	se1T	se1C	T test	ANOVA	g	g.SE	var.g	Feeding guild	Type of plant	Growing stage	Time of infestion	Level of infestation
1	Santamaria et al.	2017	Arabidopsis thaliana	Tetranychus urticae	Pigment content	mg g-1 FW	Photosynthesis	6	6	0.781	1.112	0.025	0.031	-	-	-4.8523	1.2185	1.4847	Cell-content feeder	Herbaceous	Late vegetative stage	Short	Medium
2	Kleinjan et al.	2004	Asparagus asparagoides	Zygina sp.	Plant biomass	g	Growth	12	12	7.78	14.24	1.18	1.72	-	-	-1.275	0.4506	0.203	Cell-content feeder	Herbaceous	Late vegetative stage	Long	Medium
3	Kleinjan et al.	2004	Asparagus asparagoides	Zygina sp.	Number of flowers	nº/plant	Reproduction	12	12	26.39	65.28	9.72	13.89	-	-	-0.9444	0.432	0.1866	Cell-content feeder	Herbaceous	Late vegetative stage	Long	Medium
4	Kleinjan et al.	2004	Asparagus asparagoides	Zygina sp.	Fruit production	nº/plant	Reproduction	12	12	1.39	20.83	2.78	8.34	-	-	-0.9104	0.4303	0.1852	Cell-content feeder	Herbaceous	Late vegetative stage	Long	Medium
5	Sotelo et al.	2014	Brassica rapa	Pieris brassicae	Sucrose	g/100 g Dry weight	Carbohydrate content	10	8	0.17	0.31	0.04	0.05	-	-	-1.0622	0.5095	0.2596	Chewing	Crop	Early vegetative stage	Short	High
6	Sotelo et al.	2014	Brassica rapa	Pieris brassicae	Starch	g/100 g Dry weight	Carbohydrate content	10	10	1.38	1.56	0.31	0.23	-	-	-0.2105	0.4486	0.2012	Chewing	Crop	Early vegetative stage	Short	High
7	Sotelo et al.	2014	Brassica rapa	Brevicoryne brassicae	Glucose	g/100 g Dry weight	Carbohydrate content	10	10	0.83	1.11	0.12	0.2	-	-	-0.542	0.4561	0.208	Phloem-feeding	Crop	Late vegetative stage	Short	Low
8	Sotelo et al.	2014	Brassica rapa	Brevicoryne brassicae	Fructose	g/100 g Dry weight	Carbohydrate content	10	10	0.58	0.66	0.12	0.12	-	-	-0.2128	0.4486	0.2012	Phloem-feeding	Crop	Late vegetative stage	Short	Low
9	Heng-Moss et al.	2006	Buchloe dactyloide	Blissus occiduus	Carbon exchange rate	umol CO2 m-2 s-1	Photosynthesis	10	10	5	14.7	2.9	2.3	-	-	-1.1832	0.488	0.2382	Phloem-feeding	Herbaceous	Early vegetative stage	Long	Higjh
10	Heng-Moss et al.	2006	Buchloe dactyloide	Blissus occiduus	Quantum yield	-	Photosynthesis	10	10	-	-	-	-	7.5	-	-3.2124	0.6937	0.4812	Phloem-feeding	Herbaceous	Early vegetative stage	Long	High
11	Heng-Moss et al.	2006	Buchloe dactyloide	Blissus occiduus	Efficiency of PSII	-	Photosynthesis	10	10	138.3	231.8	9.7	8.3	-	-	-2.6701	0.6279	0.3943	Phloem-feeding	Herbaceous	Early vegetative stage	Long	High
12	Roubíčková et al.	2012	Calamagrostis epigejos	Agriotes lineatus	Plant biomass	g (dry weight)	Growth	7	7	0.43	2.05	1.14	0.04	-	-	-0.7451	0.5553	0.3083	Chewing	Herbaceous	Early vegetative stage	Long	Medium
13	Roubíčková et al.	2012	Festuca rubra	Agriotes lineatus	Plant biomass	g (dry weight)	Growth	7	7	4.38	2.15	1.16	0.07	-	-	1.0372	0.5741	0.3296	Chewing	Herbaceous	Early vegetative stage	Long	Medium
14	Aldea et al.	2006	Ulmus alata	Xanthogaleruca lutea	Efficiency of PSII	-	Photosynthesis	5	5	0.55	0.54	0.01	0.01	-	-	0.4516	0.6423	0.4125	Chewing	Woody	-	-	Low
15	Aldea et al.	2006	Liriodendron tulipifera	Unknown leafminer	Efficiency of PSII	-	Photosynthesis	5	5	0.7	0.69	0	0.01	-	-	0.6387	0.6519	0.425	Chewing	Woody	-	-	Low
16	Aldea et al.	2006	Carya glabra	Cecidomyia glutinosa	Efficiency of PSII	-	Photosynthesis	5	5	0.66	0.64	0.01	0.01	-	-	0.9032	0.6708	0.45	Gall-forming	Woody	-	-	Low
17	Aldea et al.	2006	Carya glabra	Caryomyia	Efficiency of PSII	-	Photosynthesis	5	5	0..61	0.6	0.02	0.02	-	-	0.2258	0.6349	0.4031	Gall-forming	Woody	-	-	Low
18	Aldea et al.	2006	Carya glabra	Cecidomyia glutinosa	Efficiency of PSII	-	Photosynthesis	5	5	0.54	0.56	0.02	0.02	-	-	0.4516	0.6423	0.4125	Gall-forming	Woody	-	-	Low
19	Aldea et al.	2006	Quercus velutina	Cynipid waspgall	Efficiency of PSII	-	Photosynthesis	5	5	0.46	0.44	0	0.01	-	-	1.2774	0.7071	0.5	Gall-forming	Woody	-	-	Low
20	Aldea et al.	2006	Ulmus alata	Eryophiydae mite gall	Efficiency of PSII	-	Photosynthesis	5	5	0.61	0.58	0.02	0.03	-	-	0.5314	0.646	0.4173	Gall-forming	Woody	-	-	Low
21	Park and Lee	2005	Cucumis sativus	Tetranychus urticae	Leaf area	m2	Growth	10	10	0.97	1.22	0.038*	0.069*	-	-	-4.2987	0.8388	0.7036	Cell-content feeder	Crop	Late vegetative stage	Long	High
22	Park and Lee	2005	Cucumis sativus	Tetranychus urticae	Leaf area	m2	Growth	10	10	1.05	1.22	0.05*	0.069*	-	-	-2.4628	0.6044	0.3653	Cell-content feeder	Crop	Late vegetative stage	Long	Medium
23	Park and Lee	2005	Cucumis sativus	Tetranychus urticae	Leaf number	nº/plant	Growth	10	10	21.8	27.5	0.75*	1.05*	-	-	-5.9832	1.0843	1.1757	Cell-content feeder	Crop	Late vegetative stage	Long	High
24	Park and Lee	2005	Cucumis sativus	Tetranychus urticae	Leaf number	nº/plant	Growth	10	10	25.2	27.5	0.75*	1.05*	-	-	-2.4143	0.599	0.3589	Cell-content feeder	Crop	Late vegetative stage	Long	Medium
25	Park and Lee	2005	Cucumis sativus	Tetranychus urticae	Plant biomass	g (dry weight)	Growth	10	10	248	472	26.6*	72.2*	-	-	-3.9431	0.7898	0.6238	Cell-content feeder	Crop	Late vegetative stage	Long	High
26	Park and Lee	2005	Cucumis sativus	Tetranychus urticae	Plant biomass	g (dry weight)	Growth	10	10	306	472	35*	72.2*	-	-	-2.8022	0.6434	0.414	Cell-content feeder	Crop	Late vegetative stage	Long	Medium
27	Park and Lee	2005	Cucumis sativus	Tetranychus urticae	RGR	g/week	Growth	10	10	0.142	0.174	0.0053*	0.008*	-	-	-4.5166	0.8695	0.756	Cell-content feeder	Crop	Late vegetative stage	Long	High
28	Park and Lee	2005	Cucumis sativus	Tetranychus urticae	RGR	g/week	Growth	10	10	0.153	0.174	0.0059*	0.008*	-	-	-2.8614	0.6505	0.4232	Cell-content feeder	Crop	Late vegetative stage	Long	Medium
29	Park and Lee	2005	Cucumis sativus	Tetranychus urticae	Fruit production	nº/plant	Reproduction	10	10	13.3	21.2	1.03*	1.83*	-	-	-5.0955	0.9527	0.9076	Cell-content feeder	Crop	Late vegetative stage	Long	High
30	Park and Lee	2005	Cucumis sativus	Tetranychus urticae	Fruit production	nº/plant	Reproduction	10	10	18.8	21.2	2.56*	1.83*	-	-	-1.033	0.4786	0.2291	Cell-content feeder	Crop	Late vegetative stage	Long	Medium
31	Park and Lee	2005	Cucumis sativus	Tetranychus urticae	Fruit weight	total weight/plant	Reproduction	10	10	189	378	22*	59.8*	-	-	-4.0176	0.7999	0.6399	Cell-content feeder	Crop	Late vegetative stage	Long	High
32	Park and Lee	2005	Cucumis sativus	Tetranychus urticae	Fruit weight	total weight/plant	Reproduction	10	10	238	378	30.8*	59.8*	-	-	-2.819	0.6454	0.4166	Cell-content feeder	Crop	Late vegetative stage	Long	Medium
33	Bownes et al.	2010	Eichhornia crassipes	Cornops aquaticum	Plant biomass	kg	Growth	18	18	0.53	0.7	0.04	0.05	-	-	-0.8904	0.3502	0.1226	Chewing	Herbaceous	Early vegetative stage	Long	Medium
34	Vranjic and Ash	1997	Eucalyptus blakelyi	Eriococcus coriaceus	Leaf area	cm2	Growth	7	10	147.3	369.7	30.4	33.8	-	-	-2.305	0.6452	0.4163	Phloem-feeding	Woody	Late vegetative stage	Long	High
35	Vranjic and Ash	1997	Eucalyptus blakelyi	Eriococcus coriaceus	Leaf area	cm2	Growth	12	10	234.7	369.7	44.4	33.8	-	-	-1.0094	0.4565	0.2084	Phloem-feeding	Woody	Late vegetative stage	Long	Medium
36	Vranjic and Ash	1997	Eucalyptus blakelyi	Eriococcus coriaceus	Plant biomass	g	Growth	7	10	4.01	15.09	0.89	1.73	-	-	-2.4745	0.6654	0.4428	Phloem-feeding	Woody	Late vegetative stage	Long	High
37	Vranjic and Ash	1997	Eucalyptus blakelyi	Eriococcus coriaceus	Plant biomass	g	Growth	12	10	6.59	15.09	1.24	1.73	-	-	-1.7667	0.5099	0.26	Phloem-feeding	Woody	Late vegetative stage	Long	Medium
38	Vranjic and Ash	1997	Eucalyptus blakelyi	Eriococcus coriaceus	RGR	root: shoot (g/g)	Growth	7	10	0.57	0.85	0.05	0.09	-	-	-1.1916	0.5378	0.2892	Phloem-feeding	Woody	Late vegetative stage	Long	High
39	Vranjic and Ash	1997	Eucalyptus blakelyi	Eriococcus coriaceus	RGR	root: shoot (g/g)	Growth	12	10	0.62	0.85	0.07	0.09	-	-	-0.8854	0.4501	0.2026	Phloem-feeding	Woody	Late vegetative stage	Long	Medium
40	Haile and Higley	2003	Glycine max	Tetranychus urticae	Photosynthetic rate	umol CO2 m-2 s-1	Photosynthesis	8	8	13.66	20.7	1.02	0.67	-	-	-2.9153	0.7397	0.5471	Cell-content feeder	Crop	Reproductive stage	Long	High
41	Haile and Higley	2003	Glycine max	Tetranychus urticae	Stomatal conductance	mmol H20 m-2 s-1	Photosynthesis	8	8	741.71	1245	130.21	116.16	-	-	-1.4576	0.5695	0.3243	Cell-content feeder	Crop	Reproductive stage	Long	High
42	Haile and Higley	2003	Glycine max	Tetranychus urticae	Transpiration	ug H20 cm-2 s-1	Photosynthesis	8	8	20.82	32.72	3.45	4.17	-	-	-1.1112	0.5414	0.2932	Cell-content feeder	Crop	Reproductive stage	Long	High
43	Haile and Higley	2003	Glycine max	Tetranychus urticae	Pigment content	-	Photosynthesis	8	8	46.02	48	1.04	0.57	-	-	-0.8437	0.5243	0.2749	Cell-content feeder	Crop	Reproductive stage	Long	High
44	Haile and Higley	2003	Glycine max	Tetranychus urticae	Quantum yield	-	Photosynthesis	8	8	0.449	0.469	0.039	0.044	-	-	-0.1719	0.501	0.251	Cell-content feeder	Crop	Reproductive stage	Long	High
45	Macedo et al.	2003	Glycine max	Aphis glycines	Photosynthetic rate	umol CO2 m-2 s-1	Photosynthesis	8	8	-	-	-	-	-	7.93	-1.3312	0.5585	0.312	Phloem-feeding	Crop	Early vegetative stage	Long	Low
46	Macedo et al.	2003	Glycine max	Aphis glycines	Quantum yield	-	Photosynthesis	8	8	-	-	-	-	-	1.28	-0.5348	0.5099	0.26	Phloem-feeding	Crop	Early vegetative stage	Long	Low
47	Schmidt et al.	2009	Gossypium hirsutum	Spodoptera littoralis	RGR	% day	Growth	16	16	20.65	20	0.52	1.09	-	-	0.1916	0.3544	0.1256	Chewing	Crop	Late vegetative stage	Short	Low
48	Schmidt et al.	2009	Gossypium hirsutum	Tetranychus urticae	RGR	%day	Growth	15	15	27	27.83	2.13	2.17	-	-	-0.1004	0.3654	0.1335	Cell-content feeder	Crop	Late vegetative stage	Short	Low
49	Schmidt et al.	2009	Gossypium hirsutum	Spodoptera littoralis	Photosynthetic rate	ratio day3/day1	Photosynthesis	4	4	1.24	1.18	0.1	0.09	-	-	0.3166	0.7129	0.5083	Chewing	Crop	Late vegetative stage	Short	Low
50	Schmidt et al.	2009	Gossypium hirsutum	Tetranychus urticae	Photosynthetic rate	ratio day5/day1	Photosynthesis	5	5	1.31	1.54	0.19	0.06	-	-	-0.7372	0.6583	0.4333	Cell-content feeder	Crop	Late vegetative stage	Short	Low
51	Schmidt et al.	2009	Gossypium hirsutum	Spodoptera littoralis	Stomatal conductance	ratio day3/day1	Photosynthesis	4	4	1.08	1.11	0.19	0.2	-	-	-0.0772	0.7075	0.5005	Chewing	Crop	Late vegetative stage	Short	Low
52	Schmidt et al.	2009	Gossypium hirsutum	Tetranychus urticae	Stomatal conductance	ratio day5/day1	Photosynthesis	5	5	1	1.57	0.18	0.1	-	-	-1.768	0.7691	0.5916	Cell-content feeder	Crop	Late vegetative stage	Short	Low
53	Schmidt et al.	2009	Gossypium hirsutum	Spodoptera littoralis	Transpiration	ratio day3/day1	Photosynthesis	4	4	1.01	0.98	0.1	0.1	-	-	0.1506	0.7084	0.5019	Chewing	Crop	Late vegetative stage	Short	Low
54	Schmidt et al.	2009	Gossypium hirsutum	Tetranychus urticae	Transpiration	ratio day5/day1	Photosynthesis	5	5	2.75	1.5	1.2	0.07	-	-	0.6642	0.6535	0.427	Cell-content feeder	Crop	Late vegetative stage	Short	Low
55	Schmidt et al.	2009	Gossypium hirsutum	Spodoptera littoralis	Water content	% FW	Growth	3	3	38.75	42.5	6	1.5	-	-	-0.4851	0.835	0.6973	Chewing	Crop	Late vegetative stage	Short	Low
56	Schmidt et al.	2009	Gossypium hirsutum	Tetranychus urticae	Water content	% FW	Growth	5	5	42	48.5	0.85	4.42	-	-	-0.9223	0.6724	0.4521	Cell-content feeder	Crop	Late vegetative stage	Short	Low
57	Schmidt et al.	2009	Gossypium hirsutum	Spodoptera littoralis	Glucose	umol g-1 FW	Carbohydrate content	6	6	10	10.5	2.25	1.9	-	-	-0.0991	0.5778	0.3338	Chewing	Crop	Late vegetative stage	Short	Low
58	Schmidt et al.	2009	Gossypium hirsutum	Tetranychus urticae	Glucose	umol g-1 FW	Carbohydrate content	6	6	6.7	4.75	1.9	1	-	-	0.5302	0.5891	0.3471	Cell-content feeder	Crop	Late vegetative stage	Short	Low
59	Schmidt et al.	2009	Gossypium hirsutum	Spodoptera littoralis	Fructose	umol g-1 FW	Carbohydrate content	6	6	2.5	2.35	0.1	0.35	-	-	0.2406	0.5798	0.3362	Chewing	Crop	Late vegetative stage	Short	Low
60	Schmidt et al.	2009	Gossypium hirsutum	Tetranychus urticae	Fructose	umol g-1 FW	Carbohydrate content	6	6	1.6	1.75	0.2	0.15	-	-	-0.3503	0.5825	0.3393	Cell-content feeder	Crop	Late vegetative stage	Short	Low
61	Schmidt et al.	2009	Gossypium hirsutum	Spodoptera littoralis	Starch	umol g-1 FW	Carbohydrate content	6	6	0.51	0.43	0.09	0.09	-	-	0.3669	0.583	0.3399	Chewing	Crop	Late vegetative stage	Short	Low
62	Schmidt et al.	2009	Gossypium hirsutum	Tetranychus urticae	Starch	umol g-1 FW	Carbohydrate content	6	6	0.9	0.43	0.3	0.18	-	-	0.7843	0.6028	0.3634	Cell-content feeder	Crop	Late vegetative stage	Short	Low
63	Schmidt et al.	2009	Gossypium hirsutum	Spodoptera littoralis	Sucrose	umol g-1 FW	Carbohydrate content	6	6	4.4	4	0.3	0.35	-	-	0.5066	0.5881	0.3459	Chewing	Crop	Late vegetative stage	Short	Low
64	Schmidt et al.	2009	Gossypium hirsutum	Tetranychus urticae	Sucrose	umol g-1 FW	Carbohydrate content	6	6	4.1	3.5	0.6	0.65	-	-	0.396	0.584	0.341	Cell-content feeder	Crop	Late vegetative stage	Short	Low
65	Gore et al.	2013	Gossypium hirsutum	Tetranychus urticae	Yield	Lint production (kg/ha)	Reproduction	7	7	875	1254.3	50	31.7	-	-	-3.4629	0.88	0.7744	Cell-content feeder	Crop	Early vegetative stage	Long	High
66	Gore et al.	2013	Gossypium hirsutum	Tetranychus urticae	Yield	Lint production (kg/ha)	Reproduction	7	7	1000	1254.3	50	31.7	-	-	-2.3217	0.7109	0.5054	Cell-content feeder	Crop	Reproductive stage	Long	Higjh
67	Santamaria et al.	2018	Hordeum vulgare	Tetranychus urticae	Number of leaves	nº/plant	Growth	3	3	6.2	6.5	0.15	0.25	-	-	-0.8232	0.8689	0.7549	Cell-content feeder	Crop	Early vegetative stage	Short	Medium
68	Santamaria et al.	2018	Hordeum vulgare	Tetranychus urticae	Leaf lenght	cm	Growth	3	3	29	28.75	1.15	0.7	-	-	0.1486	0.8183	0.6695	Cell-content feeder	Crop	Early vegetative stage	Short	Medium
69	Santamaria et al.	2018	Hordeum vulgare	Tetranychus urticae	Water content	g	Growth	3	3	0.59	0.54	0.02	0.03	-	-	1.1094	0.9094	0.8269	Cell-content feeder	Crop	Early vegetative stage	Short	Medium
70	Santamaria et al.	2018	Hordeum vulgare	Tetranychus urticae	Quantum yield	-	Photosynthesis	3	3	1200	3080	200	120	-	-	-6.4483	2.4659	6.0809	Cell-content feeder	Crop	Early vegetative stage	Short	Medium
71	Santamaria et al.	2018	Hordeum vulgare	Tetranychus urticae	Quantum yield	-	Photosynthesis	3	3	3040	3200	280	40	-	-	-0.4525	0.8327	0.6933	Cell-content feeder	Crop	Early vegetative stage	Short	Medium
72	Santamaria et al.	2018	Hordeum vulgare	Tetranychus urticae	Chlorophyll fluorescence	-	Photosynthesis	3	3	6.5	7.32	0.25	0.23	-	-	-1.9311	1.0734	1.1522	Cell-content feeder	Crop	Early vegetative stage	Short	Medium
73	Santamaria et al.	2018	Hordeum vulgare	Tetranychus urticae	Chlorophyll fluorescence	-	Photosynthesis	3	3	7.47	7.85	0.15	0.25	-	-	-1.0427	0.899	0.8082	Cell-content feeder	Crop	Early vegetative stage	Short	Medium
74	Retuerto et al.	2004	Ilex aquifolium	Coccus sp.	Quantum yield	-	Photosynthesis	7	7	0.18	0.13	0.02	0.005	-	-	1.3109	0.5964	0.3557	Phloem-feeding	Woody	Late vegetative stage	Long	High
75	Jing et al.	2015	Jacobaea vulgaris	Spodoptera exigua	Plant biomass	g/pot	Growth	5	5	16.35	15.05	0.95	2.1	-	-	0.3602	0.6387	0.408	Chewing	Herbaceous	Early vegetative stage	Long	Low
76	Jing et al.	2015	Jacobaea vulgaris	Agriotes lineatus	Plant biomass	g/pot	Growth	5	5	22.5	15.05	3	2.1	-	-	1.2993	0.7096	0.5035	Chewing	Herbaceous	Early vegetative stage	Long	Low
77	Jing et al.	2015	Leucanthemum vulgare	Spodoptera exigua	Plant biomass	g/pot	Growth	5	5	11.4	13.95	1.05	1	-	-	-1.1232	0.6909	0.4773	Chewing	Herbaceous	Early vegetative stage	Long	Low
78	Jing et al.	2015	Leucanthemum vulgare	Agriotes lineatus	Plant biomass	g/pot	Growth	5	5	13.3	13.95	3.9	1	-	-	-0.1031	0.633	0.4007	Chewing	Herbaceous	Early vegetative stage	Long	Low
79	Harper et al.	1982	Medicago sativa	Acyrthosiphon pisum	Plant height	cm	Growth	8	8	21.33	38.78	1.25	0.61	-	-	-6.3403	1.2866	1.6553	Phloem-feeding	Herbaceous	Early vegetative stage	Long	High
80	Harper et al.	1982	Medicago sativa	Acyrthosiphon pisum	Plant biomass	g	Growth	8	8	21.42	38.06	0.81	2.1	-	-	-3.7361	0.8591	0.738	Phloem-feeding	Herbaceous	Early vegetative stage	Long	High
81	Harper et al.	1982	Medicago sativa	Acyrthosiphon pisum	Sugar content	%	Carbohydrate content	8	8	7.6	6.85	0.28	0.12	-	-	1.2442	0.5515	0.3041	Phloem-feeding	Herbaceous	Early vegetative stage	Long	High
82	Lamp et al.	2004	Medicago sativa	Empoasca fabae	Photosynthetic rate	umol CO2 m-2 s-1	Photosynthesis	5	5	3.75	7.35	0.87	0.77	-	-	-1.979	0.8	0.64	Sap-feeding	Herbaceous	Late vegetative stage	Short	Medium
83	Lamp et al.	2004	Medicago sativa	Empoasca fabae	Stomatal conductance	umol cm s-1	Photosynthesis	5	5	3.1	5.45	0.7	0.7	-	-	-1.5161	0.7354	0.5409	Sap-feeding	Herbaceous	Late vegetative stage	Short	Medium
84	Camara et al.	2020	Miconia nervosa	Atta cephalotes Atta sexdens	Number of flowers	Total number	Reproduction	5	5	125	190	41	40	-	-	-0.7248	0.6574	0.4322	Chewing	Woody	Late vegetative stage	-	High
85	Camara et al.	2020	Miconia nervosa	Atta cephalotes Atta sexdens	Fruit set	rate	Reproduction	5	5	0.65	0.48	0.3	0.2	-	-	0.3011	0.6368	0.4056	Chewing	Woody	Late vegetative stage	-	High
86	Camara et al.	2020	Miconia nervosa	Atta cephalotes Atta sexdens	Fruit production	Total number	Reproduction	5	5	95	95	145	50	-	-	0	0	0	Chewing	Woody	Late vegetative stage	-	High
87	Delaney	2012	Nerium oleander	Spodoptera eridania	Photosynthetic rate	-	Photosynthesis	9	9	1.55	8.73	0.29	1.51	-	-	-2.2236	0.6113	0.3736	Chewing	Woody	-	Short	Low
88	Delaney	2012	Nerium oleander	Spodoptera eridania	Stomatal conductance	-	Photosynthesis	9	9	0.028	0.063	0.005	0.013	-	-	-1.1966	0.5158	0.2661	Chewing	Woody	-	Short	Low
89	Delaney	2012	Nerium oleander	Spodoptera eridania	Quantum yield	-	Photosynthesis	9	9	0.37	0.4	0.01	0.03	-	-	-0.4518	0.478	0.2285	Chewing	Woody	-	Short	Low
90	Halitschke et al.	2011	Nicotiana attenuata	Manduca sexta	Leaf area	% area damaged	Growth	7	7	30	0	4.2	0	-	-	3.8607	0.945	0.8931	Chewing	Crop	Late vegetative stage	Short	Low
91	Halitschke et al.	2011	Nicotiana attenuata	Manduca sexta	CO2 assimilation	umol CO2 m-2 s-1	Photosynthesis	7	7	6.8	8.1	0.2	0.1	-	-	-3.1423	0.8295	0.6881	Chewing	Crop	Late vegetative stage	Short	Low
92	Halitschke et al.	2011	Nicotiana attenuata	Manduca sexta	Stomatal conductance	mol m-2 s-1	Photosynthesis	7	7	0.21	0.23	0.01	0.02	-	-	-0.4834	0.5434	0.2952	Chewing	Crop	Late vegetative stage	Short	Low
93	Halitschke et al.	2011	Nicotiana attenuata	Manduca sexta	Efficiency of PSII	-	Photosynthesis	7	7	0.53	0.57	0.01	0.01	-	-	-1.5288	0.6172	0.381	Chewing	Crop	Late vegetative stage	Short	Low
94	Halitschke et al.	2011	Nicotiana attenuata	Tupiocoris notatus	Leaf area	% area damaged	Growth	7	7	19.3	0	3.7	0	-	-	2.8194	0.7808	0.6096	Cell-content feeder	Crop	Late vegetative stage	Short	Low
95	Halitschke et al.	2011	Nicotiana attenuata	Tupiocoris notatus	CO2 assimilation	umol CO2 m-2 s-2	Photosynthesis	7	7	8.2	8.1	0.1	0.1	-	-	0.3822	0.5401	0.2917	Cell-content feeder	Crop	Late vegetative stage	Short	Low
96	Halitschke et al.	2011	Nicotiana attenuata	Tupiocoris notatus	Stomatal conductance	mol m-2 s-2	Photosynthesis	7	7	0.24	0.23	0.04	0.02	-	-	0.1209	0.5351	0.2863	Cell-content feeder	Crop	Late vegetative stage	Short	Low
97	Halitschke et al.	2011	Nicotiana attenuata	Tupiocoris notatus	Efficiency of PSII	-	Photosynthesis	7	7	0.59	0.57	0.01	0.01	-	-	0.7644	0.5563	0.3095	Cell-content feeder	Crop	Late vegetative stage	Short	Low
98	Preisser et al.	2007	Nicotiana tabacum	Meloidogyne incognita	Plant biomass	g (aboveground)	Growth	30	30	244	237	11.1	9.7	-	-	0.1231	0.2584	0.0668	Gall-forming	Crop	Early vegetative stage	Long	Medium
98	Preisser et al.	2007	Nicotiana tabacum	Meloidogyne incognita	Plant biomass	g (aboveground)	Growth	30	30	235	242	13.8	11.9	-	-	-0.0996	0.2584	0.0668	Gall-forming	Crop	Early vegetative stage	Long	Medium
98	Preisser et al.	2007	Nicotiana tabacum	Meloidogyne incognita	Plant biomass	g (aboveground)	Growth	30	30	250	225	10.7	11.9	-	-	0.4049	0.2609	0.0681	Gall-forming	Crop	Early vegetative stage	Long	Medium
98	Preisser et al.	2007	Nicotiana tabacum	Meloidogyne incognita	Plant biomass	g (aboveground)	Growth	30	30	264	269	8.4	10.3	-	-	-0.0975	0.2584	0.0667	Gall-forming	Crop	Early vegetative stage	Long	Medium
99	Preisser et al.	2007	Nicotiana tabacum	Meloidogyne incognita	Number of leaves	nº/plant	Growth	30	30	7.6	8.6	0.83	1	-	-	-0.1995	0.2589	0.067	Gall-forming	Crop	Early vegetative stage	Long	Medium
99	Preisser et al.	2007	Nicotiana tabacum	Meloidogyne incognita	Number of leaves	nº/plant	Growth	30	30	11.2	10.2	1.03	1.06	-	-	0.1754	0.2587	0.0669	Gall-forming	Crop	Early vegetative stage	Long	Medium
99	Preisser et al.	2007	Nicotiana tabacum	Meloidogyne incognita	Number of leaves	nº/plant	Growth	30	30	8.3	8	1.12	0.82	-	-	0.056	0.2583	0.0667	Gall-forming	Crop	Early vegetative stage	Long	Medium
99	Preisser et al.	2007	Nicotiana tabacum	Meloidogyne incognita	Number of leaves	nº/plant	Growth	30	30	11.3	10.6	0.69	0.7	-	-	0.1846	0.2588	0.067	Gall-forming	Crop	Early vegetative stage	Long	Medium
100	Preisser et al.	2007	Nicotiana tabacum	Meloidogyne incognita	Flower production	Total number	Reproduction	30	30	34.9	29	6.4	5.15	-	-	0.1862	0.2588	0.067	Gall-forming	Crop	Early vegetative stage	Long	Medium
100	Preisser et al.	2007	Nicotiana tabacum	Meloidogyne incognita	Flower production	Total number	Reproduction	30	30	28.5	19.8	7.2	7.2	-	-	0.2215	0.259	0.0671	Gall-forming	Crop	Early vegetative stage	Long	Medium
100	Preisser et al.	2007	Nicotiana tabacum	Meloidogyne incognita	Flower production	Total number	Reproduction	30	30	39.3	26.5	6.1	6	-	-	0.3878	0.2607	0.068	Gall-forming	Crop	Early vegetative stage	Long	Medium
100	Preisser et al.	2007	Nicotiana tabacum	Meloidogyne incognita	Flower production	Total number	Reproduction	30	30	20.2	40	7.1	6.4	-	-	-0.5369	0.2629	0.0691	Gall-forming	Crop	Early vegetative stage	Long	Medium
101	Bufon et al.	2020	Oryza sativa	Schizotetranychus oryzae	Plant height	m	Growth	50	10	1.3	1.32	0.04	0.05	-	-	-0.0748	0.3465	0.12	Cell-content feeder	Crop	Late vegetative stage	Long	Medium
101	Bufon et al.	2020	Oryza sativa	Schizotetranychus oryzae	Plant height	m	Growth	50	10	1.28	1.11	0.03	0.04	-	-	0.8443	0.3551	0.1261	Cell-content feeder	Crop	Late vegetative stage	Long	Medium
101	Bufon et al.	2020	Oryza sativa	Schizotetranychus oryzae	Plant height	m	Growth	50	10	0.81	0.86	0.02	0.03	-	-	-0.3697	0.3481	0.1212	Cell-content feeder	Crop	Late vegetative stage	Long	Medium
101	Bufon et al.	2020	Oryza sativa	Schizotetranychus oryzae	Plant height	m	Growth	50	10	1.21	1.14	0.04	0.04	-	-	0.264	0.3473	0.1206	Cell-content feeder	Crop	Late vegetative stage	Long	Medium
102	Bufon et al.	2020	Oryza sativa	Schizotetranychus oryzae	Pigment content	mg g-1 FW	Photosynthesis	3	3	5.6	11.45	0.4	1.61	-	-	-2.8211	1.305	1.7029	Cell-content feeder	Crop	Late vegetative stage	Long	High
102	Bufon et al.	2020	Oryza sativa	Schizotetranychus oryzae	Pigment content	mg g-1 FW	Photosynthesis	3	3	7.2	9.33	1.3	0.62	-	-	-1.1831	0.9214	0.8489	Cell-content feeder	Crop	Late vegetative stage	Long	High
102	Bufon et al.	2020	Oryza sativa	Schizotetranychus oryzae	Pigment content	mg g-1 FW	Photosynthesis	3	3	11.35	10.75	0.95	1.08	-	-	0.3337	0.8253	0.6812	Cell-content feeder	Crop	Late vegetative stage	Long	High
102	Bufon et al.	2020	Oryza sativa	Schizotetranychus oryzae	Pigment content	mg g-1 FW	Photosynthesis	3	3	6.95	10.15	0.65	1	-	-	-2.1464	1.1254	1.2665	Cell-content feeder	Crop	Late vegetative stage	Long	High
103	Bufon et al.	2020	Oryza sativa	Schizotetranychus oryzae	Seed weight	g	Reproduction	10	10	1.25	1.2	0.25	0.1	-	-	0.0838	0.4474	0.2002	Cell-content feeder	Crop	Late vegetative stage	Long	High
104	Blasi et al.	2017	Oryza sativa	Schizotetranychus oryzae	Pigment content	mg g-1 FW	Photosynthesis	3	3	10.4	14.5	0.1	1.4	-	-	-2.3369	1.1738	1.3777	Cell-content feeder	Crop	Late vegetative stage	Long	High
105	Watanabe and Kitagawa	2000	Oryza sativa	Nilaparvata lugens	Leaf area	-	Growth	5	5	-	-	-	-	-	1.07	-0.5909	0.6492	0.4214	Phloem-feeding	Crop	Late vegetative stage	Long	High
106	Watanabe and Kitagawa	2000	Oryza sativa	Nilaparvata lugens	Plant biomass	g	Growth	5	5	5.46	5.75	0.09	0.1	-	-	-1.7244	1.0266	1.0539	Phloem-feeding	Crop	Late vegetative stage	Long	High
107	Watanabe and Kitagawa	2000	Oryza sativa	Nilaparvata lugens	Photosynthetic rate	umol CO2 m-2 s-1	Photosynthesis	5	5	11.55	16.74	0.86	0.41	-	-	-4.358	1.7719	3.1396	Phloem-feeding	Crop	Late vegetative stage	Long	High
108	Zangerl et al.	2002	Pastinaca sativa	Trichoplusia ni	Photosynthetic rate	-	Photosynthesis	10	10	-	-	-	-	3.26	-	-0.7733	0.4651	0.2163	Chewing	Crop	Early vegetative stage	Short	Low
109	Kozel et al.	2017	Pinus silvestris	Melolontha melolontha	Plant biomass	g	Growth	21	32	0.74	1.28	0.21	0.26	-	-	-0.418	0.2838	0.0806	Chewing	Woody	Late vegetative stage	Long	High
110	Kozel et al.	2017	Picea abies	Melolontha melolontha	Plant biomass	g	Growth	18	32	1.16	1.43	0.29	0.29	-	-	-0.1796	0.2952	0.0871	Chewing	Woody	Late vegetative stage	Long	High
111	Kozel et al.	2017	Betula pendula	Melolontha melolontha	Plant biomass	g	Growth	23	32	0.51	1.14	0.17	0.25	-	-	-0.5254	0.278	0.0773	Chewing	Woody	Late vegetative stage	Long	High
112	Hutchinson et al.	1994	Beta vulgaris	Pemphigus betae	Yield	mt/ha	Reproduction	5	5	-	-	-	-	-	2.17	-0.8415	0.6659	0.4434	Phloem-feeding	Crop	Late vegetative stage	Long	High
112	Hutchinson et al.	1994	Beta vulgaris	Pemphigus betae	Yield	mt/ha	Reproduction	5	5	-	-	-	-	-	4.5	-1.2118	0.7	0.49	Phloem-feeding	Crop	Late vegetative stage	Long	High
112	Hutchinson et al.	1994	Beta vulgaris	Pemphigus betae	Yield	mt/ha	Reproduction	5	5	-	-	-	-	-	3.98	-1.1396	0.6925	0.4796	Phloem-feeding	Crop	Late vegetative stage	Long	High
112	Hutchinson et al.	1994	Beta vulgaris	Pemphigus betae	Yield	mt/ha	Reproduction	5	5	-	-	-	-	-	3.41	-1.0549	0.6843	0.4682	Phloem-feeding	Crop	Late vegetative stage	Long	High
112	Hutchinson et al.	1994	Beta vulgaris	Pemphigus betae	Yield	mt/ha	Reproduction	5	5	-	-	-	-	-	2.5	-0.9032	0.6708	0.45	Phloem-feeding	Crop	Late vegetative stage	Long	High
112	Hutchinson et al.	1994	Beta vulgaris	Pemphigus betae	Yield	mt/ha	Reproduction	4	4	-	-	-	-	-	1.92	-0.852	0.7483	0.56	Phloem-feeding	Crop	Late vegetative stage	Long	High
112	Hutchinson et al.	1994	Beta vulgaris	Pemphigus betae	Yield	mt/ha	Reproduction	4	4	-	-	-	-	-	1.43	-0.7353	0.738	0.5447	Phloem-feeding	Crop	Late vegetative stage	Long	High
112	Hutchinson et al.	1994	Beta vulgaris	Pemphigus betae	Yield	mt/ha	Reproduction	4	4	-	-	-	-	-	4.7	-1.333	0.8043	0.6469	Phloem-feeding	Crop	Late vegetative stage	Long	High
112	Hutchinson et al.	1994	Beta vulgaris	Pemphigus betae	Yield	mt/ha	Reproduction	4	4	-	-	-	-	-	0.41	-0.3937	0.7161	0.5128	Phloem-feeding	Crop	Late vegetative stage	Long	High
112	Hutchinson et al.	1994	Beta vulgaris	Pemphigus betae	Yield	mt/ha	Reproduction	4	4	-	-	-	-	-	3.77	-1.1939	0.786	0.6178	Phloem-feeding	Crop	Late vegetative stage	Long	High
112	Hutchinson et al.	1994	Beta vulgaris	Pemphigus betae	Yield	mt/ha	Reproduction	4	4	-	-	-	-	-	24.2	-3.0248	1.1208	1.2562	Phloem-feeding	Crop	Late vegetative stage	Long	High
113	Peschiutta et al	2020	Prunus avium	Caliroa cerasi	Number of flowers	Nº/branch	Reproduction	19	14	-	-	-	-	-	10.92	1.1355	0.3802	0.1446	Chewing	Woody	Late vegetative stage	Long	Medium
114	Peschiutta et al	2020	Prunus avium	Caliroa cerasi	Fruit production	nº/branch meter	Reproduction	19	14	-	-	-	-	-	0.02	0.0486	0.3523	0.1241	Chewing	Woody	Late vegetative stage	Long	Medium
115	Peschiutta et al	2020	Prunus avium	Caliroa cerasi	Fruit weight	g	Reproduction	19	14	-	-	-	-	-	4.33	-0.715	0.3636	0.1322	Chewing	Woody	Late vegetative stage	Long	Medium
116	Peschiutta et al	2020	Prunus avium	Caliroa cerasi	Fruit quality	SSC(ºBRIX)	Reproduction	19	14	-	-	-	-	-	9.41	-1.0541	0.3765	0.1417	Chewing	Woody	Late vegetative stage	Long	Medium
116	Peschiutta et al	2020	Prunus avium	Caliroa cerasi	Fruit quality	Tritatable acidity (%)	Reproduction	19	14	-	-	-	-	-	10.3	-1.1028	0.3787	0.1434	Chewing	Woody	Late vegetative stage	Long	Medium
117	Peschiutta et al	2020	Prunus avium	Caliroa cerasi	Seed weight	g	Reproduction	19	14	-	-	-	-	-	4.23	-0.7067	0.3633	0.132	Chewing	Woody	Late vegetative stage	Long	Medium
118	Agrawal et al.	1999	Raphanus raphanistrum	Pieris rapae	Days to first flower	days	Reproduction	70	70	36.69	33.55	0.72	0.68	-	-	0.5369	0.1721	0.0296	Chewing	Herbaceous	Early vegetative stage	Short	Medium
119	Agrawal et al.	1999	Raphanus raphanistrum	Pieris rapae	Seed weight	g	Reproduction	70	70	0.003	0.003	0.001	0.001	-	-	0	0	0	Chewing	Herbaceous	Early vegetative stage	Short	Medium
120	Agrawal et al.	1999	Raphanus raphanistrum	Pieris rapae	Seed production	nª/plant	Reproduction	70	70	209.68	340.6	13.66	15.43	-	-	-1.0757	0.181	0.0327	Chewing	Herbaceous	Early vegetative stage	Short	Medium
121	Agrawal et al.	1999	Raphanus raphanistrum	Pieris rapae	Pollen production	nº/plant	Reproduction	70	70	55585	63091	2058	1556	-	-	-0.4926	0.1716	0.0294	Chewing	Herbaceous	Early vegetative stage	Short	Medium
122	Agrawal et al.	1999	Raphanus raphanistrum	Pieris rapae	Pollen size	um3	Reproduction	70	70	4418	4555	35	47	-	-	-0.3959	0.1707	0.0291	Chewing	Herbaceous	Early vegetative stage	Short	Medium
123	Poveda et al.	2003	Sinapis arvensis	Pieris rapae	Plant height	cm	Growth	24	24	42.84	50.93	3.03	2.4	-	-	-0.6071	0.2955	0.0873	Chewing	Herbaceous	Early vegetative stage	Short	Medium
124	Poveda et al.	2003	Sinapis arvensis	Pieris rapae	Plant biomass	g	Growth	24	24	6.5	8.14	0.58	0.63	-	-	-0.5555	0.2944	0.0867	Chewing	Herbaceous	Early vegetative stage	Short	Medium
125	Poveda et al.	2003	Sinapis arvensis	Pieris rapae	Days to first flower	days	Reproduction	24	24	32	26.4	0.9	0.7	-	-	-1.4246	0.3243	0.1052	Chewing	Herbaceous	Early vegetative stage	Short	Medium
126	Poveda et al.	2003	Sinapis arvensis	Agriotes sp	Flowering period	days	Reproduction	24	24	40	33	1.7	1.4	-	-	-0.9219	0.3041	0.0925	Chewing	Herbaceous	Early vegetative stage	Long	Medium
127	Poveda et al.	2003	Sinapis arvensis	Agriotes sp	Fruit production	nº/plant	Reproduction	24	24	196.62	147.35	13.52	14.49	-	-	0.7211	0.2982	0.0889	Chewing	Herbaceous	Early vegetative stage	Long	Medium
128	Poveda et al.	2003	Sinapis arvensis	Agriotes sp	Seed production	nº/fruit	Reproduction	20	20	8.45	11.25	0.55	0.3	-	-	-1.2963	0.3185	0.1014	Chewing	Herbaceous	Early vegetative stage	Long	Medium
129	Sanford and Webb	1997	Solanum tuberosum	Empoasca fabae	Yield	% loss of yield	Reproduction	6	6	44	0	6	0	-	-	-4.2812	1.1089	1.2296	Sap-feeding	Crop	Early vegetative stage	Long	High
130	Bardner et al.	1968	Triticum aestivum	Leptohylemyia coarctata larvae	Seed production	nº/ear	Reproduction	4	4	35.7	30.4	1.51	1.51	-	-	1.7621	0.8699	0.7567	Chewing	Crop	Late vegetative stage	Long	High
130	Bardner et al.	1968	Triticum aestivum	Leptohylemyia coarctata larvae	Seed production	nº/ear	Reproduction	4	4	36	30.5	1.38	1.38	-	-	2.1828	0.9454	0.8938	Chewing	Crop	Late vegetative stage	Long	High
131	Bardner et al.	1968	Triticum aestivum	Leptohylemyia coarctata larvae	Seed weight	mg	Reproduction	4	4	33.7	35.2	0.55	0.55	-	-	-1.3692	0.8093	0.655	Chewing	Crop	Late vegetative stage	Long	High
131	Bardner et al.	1968	Triticum aestivum	Leptohylemyia coarctata larvae	Seed weight	mg	Reproduction	4	4	52.6	48.5	0.9	0.9	-	-	2.2871	0.9656	0.9324	Chewing	Crop	Late vegetative stage	Long	High
132	Bardner et al.	1968	Triticum aestivum	Leptohylemyia coarctata larvae	Yield	cwt per acre at 85% dry matter	Reproduction	4	4	30.3	38.7	2.45	2.45	-	-	-1.7213	0.8631	0.7449	Chewing	Crop	Late vegetative stage	Long	High
132	Bardner et al.	1968	Triticum aestivum	Leptohylemyia coarctata larvae	Yield	cwt per acre at 85% dry matter	Reproduction	4	4	40.7	49.3	1.4	1.4	-	-	-3.084	1.1341	1.2861	Chewing	Crop	Late vegetative stage	Long	High
133	Haile et al.	1999	Triticum aestivum	Diuraphis noxia	Photosynthetic rate	umol CO2 m-2 s-1	Photosynthesis	7	7	16.43	23.91	1.39	1.22	-	-	-2.186	0.6931	0.4804	Phloem-feeding	Crop	Early vegetative stage	Long	Medium
133	Haile et al.	1999	Triticum aestivum	Diuraphis noxia	Photosynthetic rate	umol CO2 m-2 s-1	Photosynthesis	7	7	17.37	27.34	1.39	1.27	-	-	-2.8621	0.7871	0.6195	Phloem-feeding	Crop	Early vegetative stage	Long	Medium
133	Haile et al.	1999	Triticum aestivum	Diuraphis noxia	Photosynthetic rate	umol CO2 m-2 s-1	Photosynthesis	7	7	20.91	28.34	1.3	1.87	-	-	-1.7633	0.6422	0.4124	Phloem-feeding	Crop	Early vegetative stage	Long	Medium
134	Haile et al.	1999	Triticum aestivum	Diuraphis noxia	Pigment content	-	Photosynthesis	7	7	0.383	0.514	0.02	0.02	-	-	-2.5033	0.7356	0.5411	Phloem-feeding	Crop	Early vegetative stage	Long	Medium
134	Haile et al.	1999	Triticum aestivum	Diuraphis noxia	Pigment content	-	Photosynthesis	7	7	0.33	0.447	0.024	0.04	-	-	-1.3557	0.6005	0.3606	Phloem-feeding	Crop	Early vegetative stage	Long	Medium
134	Haile et al.	1999	Triticum aestivum	Diuraphis noxia	Pigment content	-	Photosynthesis	7	7	0.447	0.574	0.04	0.003	-	-	-1.3475	0.5998	0.3597	Phloem-feeding	Crop	Early vegetative stage	Long	Medium
135	Haile et al.	1999	Triticum aestivum	Diuraphis noxia	Plant biomass	g (aboveground)	Growth	7	7	0.534	0.538	0.02	0.02	-	-	-0.0764	0.5347	0.286	Phloem-feeding	Crop	Early vegetative stage	Long	Medium
135	Haile et al.	1999	Triticum aestivum	Diuraphis noxia	Plant biomass	g (aboveground)	Growth	7	7	0.385	0.604	0.04	0.06	-	-	-1.6415	0.6289	0.3955	Phloem-feeding	Crop	Early vegetative stage	Long	Medium
135	Haile et al.	1999	Triticum aestivum	Diuraphis noxia	Plant biomass	g (aboveground)	Growth	7	7	0.624	0.718	0.05	0.03	-	-	-0.8713	0.5627	0.3167	Phloem-feeding	Crop	Early vegetative stage	Long	Medium
136	Haile et al.	1999	Triticum aestivum	Diuraphis noxia	Leaf area	cm2	Growth	7	7	10.64	17.05	0.47	1.4	-	-	-2.346	0.7141	0.51	Phloem-feeding	Crop	Early vegetative stage	Long	Medium
136	Haile et al.	1999	Triticum aestivum	Diuraphis noxia	Leaf area	cm2	Growth	7	7	9.84	14.99	0.48	0.88	-	-	-2.2011	0.6951	0.4831	Phloem-feeding	Crop	Early vegetative stage	Long	Medium
136	Haile et al.	1999	Triticum aestivum	Diuraphis noxia	Leaf area	cm2	Growth	7	7	12.93	19.65	1.17	0.97	-	-	-2.3899	0.72	0.5185	Phloem-feeding	Crop	Early vegetative stage	Long	Medium
137	Gianoli and Niemeyer	1997	Triticum uniaristatum	Rhopalosiphum padi	Leaf length	mm	Growth	30	30	0.04	1.43	0.04	0.96	-	-	-0.375	0.2605	0.0679	Phloem-feeding	Crop	Late vegetative stage	Short	Medium
137	Gianoli and Niemeyer	1997	Triticum uniaristatum	Rhopalosiphum padi	Leaf length	mm	Growth	30	30	16.72	13.9	1.75	1.59	-	-	0.3091	0.2598	0.0675	Phloem-feeding	Crop	Late vegetative stage	Short	Medium
138	Liu et al.	2018	Solanum lycopersicum	Tetranychus urticae	Plant biomass	g	Growth	5	5	46.4	50	3.3	2	-	-	-0.5958	0.6494	0.4218	Cell-content feeder	Crop	Early vegetative stage	Long	Low
139	Liu et al.	2018	Solanum lycopersicum	Tetranychus urticae	Fruit production	nº/plant	Reproduction	15	15	10.5	16.5	1	0.7	-	-	-1.8076	0.4369	0.1909	Cell-content feeder	Crop	Early vegetative stage	Long	Low
140	Liu et al.	2018	Solanum lycopersicum	Tetranychus urticae	Seed production	nº/plant	Reproduction	15	15	26.7435	27.72	9.975	10.23	-	-	-0.0251	0.3652	0.1333	Cell-content feeder	Crop	Early vegetative stage	Long	Low
141	Liu et al.	2018	Solanum lycopersicum	Tetranychus urticae	Seed production	viable seeds/plant	Reproduction	15	15	20	25	6.5	7.5	-	-	-0.1853	0.366	0.1339	Cell-content feeder	Crop	Early vegetative stage	Long	Low
142	Liu et al.	2018	Solanum lycopersicum	Tetranychus evansi	Plant biomass	g	Growth	5	5	36.1	50	2.8	2	-	-	-2.58	0.8989	0.808	Cell-content feeder	Crop	Early vegetative stage	Long	Low
143	Liu et al.	2018	Solanum lycopersicum	Tetranychus evansi	Fruit production	nº/plant	Reproduction	15	15	7.13	16.5	0.93	0.7	-	-	-2.9603	0.5363	0.2876	Cell-content feeder	Crop	Early vegetative stage	Long	Low
144	Liu et al.	2018	Solanum lycopersicum	Tetranychus evansi	Seed production	nº/plant	Reproduction	15	15	33.1545	27.72	9.0551	10.23	-	-	0.1463	0.3657	0.1337	Cell-content feeder	Crop	Early vegetative stage	Long	Low
145	Liu et al.	2018	Solanum lycopersicum	Tetranychus evansi	Seed production	viable seeds/plant	Reproduction	15	15	30.6	25	9.4	7.5	-	-	0.1713	0.3659	0.1338	Cell-content feeder	Crop	Early vegetative stage	Long	Low
146	Collins et al.	2001	Salix viminalis	Tuberolachnus salignus	Photosynthetic rate	umol m-2 s-1	Photosynthesis	12	12	8.53	3.9	0.97	0.97	-	-	1.3895	0.4581	0.2098	Phloem-feeding	Woody	Late vegetative stage	Long	Low
146	Collins et al.	2001	Salix viminalis	Tuberolachnus salignus	Photosynthetic rate	umol m-2 s-1	Photosynthesis	12	12	9.87	5.48	0.86	0.86	-	-	1.486	0.4648	0.216	Phloem-feeding	Woody	Late vegetative stage	Long	Low
146	Collins et al.	2001	Salix viminalis	Tuberolachnus salignus	Photosynthetic rate	umol m-2 s-1	Photosynthesis	12	12	9.54	5.41	0.66	0.66	-	-	1.8217	0.4907	0.2408	Phloem-feeding	Woody	Late vegetative stage	Long	Low
147	Collins et al.	2001	Salix viminalis	Pterocomma salicis	Plant biomass	g (aboveground)	Growth	13	13	223	288.7	14.83	14.83	-	-	-1.2385	0.4305	0.1853	Phloem-feeding	Woody	Late vegetative stage	Long	Medium
148	Collins et al.	2001	Salix viminalis	Tuberolachnus salignus	Plant biomass	g (aboveground)	Growth	13	13	136.2	288.7	14.83	14.83	-	-	-2.8748	0.5686	0.3233	Phloem-feeding	Woody	Late vegetative stage	Long	Low
149	Donovan et al.	2013	Nicotiana attenuata	Myzus persicae	Photosynthetic rate	umol CO2 m-2 s-1	Photosynthesis	9	9	25.2	27.3	1	0.9	-	-	-0.7433	0.489	0.2391	Phloem-feeding	Crop	Early vegetative stage	Short	High
150	Donovan et al.	2013	Nicotiana attenuata	Myzus persicae	Photosynthetic rate	umol CO2 m-2 s-1	Photosynthesis	9	9	25.2	27.3	1.1	0.9	-	-	-0.7036	0.4872	0.2374	Phloem-feeding	Crop	Early vegetative stage	Short	Low
151	Donovan et al.	2013	Nicotiana attenuata	Myzus persicae	Stomatal conductance	mol H2O m-2 s-1	Photosynthesis	9	9	0.39	0.56	0.02	0.03	-	-	-2.2452	0.6137	0.3766	Phloem-feeding	Crop	Early vegetative stage	Short	High
152	Donovan et al.	2013	Nicotiana attenuata	Myzus persicae	Stomatal conductance	mol H2O m-2 s-1	Photosynthesis	9	9	0.44	0.56	0.03	0.03	-	-	-1.3469	0.527	0.2778	Phloem-feeding	Crop	Early vegetative stage	Short	Low
153	Donovan et al.	2013	Nicotiana attenuata	Myzus persicae	Quantum yield	-	Photosynthesis	9	9	0.466	0.465	0.007	0.008	-	-	0.0448	0.4715	0.2223	Phloem-feeding	Crop	Early vegetative stage	Short	High
154	Donovan et al.	2013	Nicotiana attenuata	Myzus persicae	Quantum yield	-	Photosynthesis	9	9	0.469	0.465	0.01	0.008	-	-	0.1487	0.4721	0.2229	Phloem-feeding	Crop	Early vegetative stage	Short	Low
155	Donovan et al.	2013	Nicotiana attenuata	Myzus persicae	Photosynthetic rate	umol CO2 m-2 s-1	Photosynthesis	9	9	19.5	21.5	1.8	1.3	-	-	-0.4289	0.4773	0.2279	Phloem-feeding	Crop	Early vegetative stage	Long	High
156	Donovan et al.	2013	Nicotiana attenuata	Myzus persicae	Photosynthetic rate	umol CO2 m-2 s-1	Photosynthesis	9	9	22.5	21.5	1.1	1.3	-	-	0.2796	0.4739	0.2246	Phloem-feeding	Crop	Early vegetative stage	Long	Low
157	Donovan et al.	2013	Nicotiana attenuata	Myzus persicae	Stomatal conductance	mol H2O m-2 s-1	Photosynthesis	9	9	0.35	0.31	0.04	0.03	-	-	0.381	0.4761	0.2267	Phloem-feeding	Crop	Early vegetative stage	Long	High
158	Donovan et al.	2013	Nicotiana attenuata	Myzus persicae	Stomatal conductance	mol H2O m-2 s-1	Photosynthesis	9	9	0.32	0.31	0.02	0.03	-	-	0.1321	0.472	0.2228	Phloem-feeding	Crop	Early vegetative stage	Long	Low
159	Donovan et al.	2013	Nicotiana attenuata	Myzus persicae	Quantum yield	-	Photosynthesis	9	9	0.389	0.434	0.023	0.002	-	-	-0.9282	0.4986	0.2486	Phloem-feeding	Crop	Early vegetative stage	Long	High
160	Donovan et al.	2013	Nicotiana attenuata	Myzus persicae	Quantum yield	-	Photosynthesis	9	9	0.435	0.434	0.018	0.002	-	-	0.0263	0.4714	0.2222	Phloem-feeding	Crop	Early vegetative stage	Long	Low
161	Donovan et al.	2013	Nicotiana attenuata	Myzus persicae	Plant biomass	g	Growth	12	12	8.8	15.4	0.9	1.5	-	-	-1.5533	0.4697	0.2206	Phloem-feeding	Crop	Early vegetative stage	Long	High
162	Donovan et al.	2013	Nicotiana attenuata	Myzus persicae	Plant biomass	g	Growth	12	12	12.3	15.4	1.2	1.5	-	-	-0.6644	0.4202	0.1765	Phloem-feeding	Crop	Early vegetative stage	Long	Low
163	Donovan et al.	2013	Nicotiana attenuata	Myzus persicae	Seed weight	mg	Reproduction	12	12	5.3	6.5	0.2	0.2	-	-	-1.7467	0.4846	0.2348	Phloem-feeding	Crop	Early vegetative stage	Long	High
164	Donovan et al.	2013	Nicotiana attenuata	Myzus persicae	Seed weight	mg	Reproduction	12	12	5.9	6.5	0.2	0.2	-	-	-0.8733	0.4286	0.1837	Phloem-feeding	Crop	Early vegetative stage	Long	Low
165	Donovan et al.	2013	Nicotiana attenuata	Myzus persicae	Branch production	nº/plant	Growth	12	12	19	23	1	1	-	-	-1.1645	0.4438	0.197	Phloem-feeding	Crop	Early vegetative stage	Long	High
166	Donovan et al.	2013	Nicotiana attenuata	Myzus persicae	Branch production	nº/plant	Growth	12	12	21	23	1	1	-	-	-0.5822	0.4174	0.1742	Phloem-feeding	Crop	Early vegetative stage	Long	Low
167	Mundim et al.	2016	Solanum lycocarpum	Spodoptera sp.	Stem size	cm	Growth	10	14	11.15	16.93	2.47	2.02	-	-	-0.7608	0.4294	0.1844	Chewing	Herbaceous	Reproductive stage	Long	Low
168	Mundim et al.	2016	Solanum lycocarpum	Meloidogyne incognita	Stem size	cm	Growth	9	14	14.944	16.93	1.544	2.02	-	-	-0.3023	0.4297	0.1847	Gall-forming	Herbaceous	Reproductive stage	Long	Medium
167	Mundim et al.	2016	Solanum lycocarpum	Spodoptera sp.	Stem size	mm	Growth	10	14	2.19	2.45	0.252	0.187	-	-	-0.3542	0.4174	0.1742	Chewing	Herbaceous	Reproductive stage	Long	Low
168	Mundim et al.	2016	Solanum lycocarpum	Meloidogyne incognita	Stem size	mm	Growth	9	14	2.6	2.45	0.113	0.187	-	-	0.2554	0.429	0.1841	Gall-forming	Herbaceous	Reproductive stage	Long	Medium
169	Mundim et al.	2016	Solanum lycocarpum	Spodoptera sp.	Number of leaves	nº/plant	Growth	10	14	7.3	4.57	0.578	0.358	-	-	1.7712	0.4915	0.2415	Chewing	Herbaceous	Reproductive stage	Long	Low
170	Mundim et al.	2016	Solanum lycocarpum	Meloidogyne incognita	Number of leaves	nº/plant	Growth	9	14	4.444	4.57	0.377	0.358	-	-	-0.1004	0.4275	0.1828	Gall-forming	Herbaceous	Reproductive stage	Long	Medium
171	Mundim et al.	2016	Solanum lycocarpum	Spodoptera sp.	Leaf area	cm2	Growth	10	14	52.852	32.43	4.268	4.58	-	-	1.3053	0.4577	0.2095	Chewing	Herbaceous	Reproductive stage	Long	Low
172	Mundim et al.	2016	Solanum lycocarpum	Meloidogyne incognita	Leaf area	cm2	Growth	9	14	27.687	32.43	4.65	4.58	-	-	-0.2984	0.4297	0.1846	Gall-forming	Herbaceous	Reproductive stage	Long	Medium
173	Mundim et al.	2016	Solanum lycocarpum	Spodoptera sp.	Plant biomass	g (dry weight)	Growth	10	14	0.451	0.977	0.137	0.158	-	-	-0.9943	0.4399	0.1935	Chewing	Herbaceous	Reproductive stage	Long	Low
174	Mundim et al.	2016	Solanum lycocarpum	Meloidogyne incognita	Plant biomass	g (dry weight)	Growth	9	14	0.882	0.997	0.142	0.158	-	-	-0.2164	0.4285	0.1836	Gall-forming	Herbaceous	Reproductive stage	Long	Medium
175	Reddall et al.	2004	Gossypium hirsutum	Tetranychus urticae	Photosynthetic rate	umol CO2 m-2s-1	Photosynthesis	4	4	0	9.74	0.77	1.03	-	-	-5.3774	1.7	2.8901	Cell-content feeder	Crop	Late vegetative stage	Long	Medium
176	Reddall et al.	2004	Gossypium hirsutum	Tetranychus urticae	Stomatal conductance	mol H2O m-2s-1	Photosynthesis	4	4	0.08	0.27	0.01	0.04	-	-	-3.2718	1.1768	1.3848	Cell-content feeder	Crop	Late vegetative stage	Long	Medium
177	Reddall et al.	2004	Gossypium hirsutum	Tetranychus urticae	Transpiration	mol H20 m-2 s-1	Photosynthesis	4	4	2.77	5.96	0.34	0.28	-	-	-5.1422	1.6388	2.6856	Cell-content feeder	Crop	Late vegetative stage	Long	Medium
178	Pincebourde et al.	2006	Malus domestica	Phyllonorycter blancardella	Stomatal conductance	mol m-2s-1	Photosynthesis	10	10	0.198	0.348	0.034*	0.034*	-	-	-4.2254	0.8286	0.6866	Leafminer	Woody	Late vegetative stage	Long	-
179	Pincebourde et al.	2006	Malus domestica	Phyllonorycter blancardella	Stomatal conductance	mol m-2s-1	Photosynthesis	10	10	0.134	0.348	0.038*	0.034*	-	-	-5.6845	1.0396	1.0807	Leafminer	Woody	Late vegetative stage	Long	-
180	Pincebourde et al.	2006	Malus domestica	Phyllonorycter blancardella	Transpiration	mmol m-2s-1	Photosynthesis	10	10	2.006	3.073	0.33*	0.35*	-	-	-3.0043	0.6678	0.446	Leafminer	Woody	Late vegetative stage	Long	-
181	Pincebourde et al.	2006	Malus domestica	Phyllonorycter blancardella	Transpiration	mmol m-2s-1	Photosynthesis	10	10	1.427	3.073	0.493*	0.35*	-	-	-3.6874	0.7554	0.5706	Leafminer	Woody	Late vegetative stage	Long	-
182	Tang et al.	2006	Arabidopsis thaliana	Trichoplusia ni	Efficiency of PSII	-	Photosynthesis	8	8	0.74	0.77	0.004	0.004	-	-	-2.6801	0.7079	0.5011	Chewing	Herbaceous	Late vegetative stage	Short	Medium
183	Tang et al.	2006	Arabidopsis thaliana	Trichoplusia ni	Efficiency of PSII	-	Photosynthesis	8	8	0.77	0.78	0.004	0.005	-	-	-0.7893	0.5213	0.2718	Chewing	Herbaceous	Late vegetative stage	Short	Medium
184	Delaney et al.,	2008	Asclepias syriaca	Euchaetes egle	Photosynthetic rate	umol CO2 m-2 s-1	Photosynthesis	4	5	4.68	12.59	0.43	0.57	-	-	-7.1012	1.9989	3.9957	Chewing	Herbaceous	Early vegetative stage	Short	Medium
185	Delaney et al.,	2008	Asclepias syriaca	Danaus plexipus	Photosynthetic rate	umol CO2 m-2 s-1	Photosynthesis	16	16	15.64	22.37	1.76	1.03	-	-	-1.1747	0.3843	0.1477	Chewing	Herbaceous	Early vegetative stage	Short	Medium
186	Delaney et al.,	2008	Asclepias syriaca	Estigmene acrea	Photosynthetic rate	umol CO2 m-2 s-1	Photosynthesis	4	9	12.46	14.84	1.4	1.31	-	-	-0.6504	0.6164	0.3799	Chewing	Herbaceous	Early vegetative stage	Short	Medium
187	Macedo et al. (2)	2009	Triticum aestivum	Rophalosiphum padi	Photosynthetic rate	umol CO2 m-2 s-1	Photosynthesis	4	4	14.4	19.3	1.3	1.9	-	-	-1.5112	0.8299	0.6888	Phloem-feeding	Crop	Late vegetative stage	Long	High
188	Macedo et al. (2)	2009	Triticum aestivum	Diuraphis noxia	Photosynthetic rate	umol CO2 m-2 s-1	Photosynthesis	4	4	15.9	19.3	1	1.9	-	-	-1.1243	0.7775	0.6045	Phloem-feeding	Crop	Late vegetative stage	Long	High
189	Macedo et al. (2)	2009	Triticum aestivum	Rophalosiphum padi	Photosynthetic rate	umol CO2 m-2 s-1	Photosynthesis	4	4	18.1	21.1	1.3	0.4	-	-	-1.566	0.8383	0.7027	Phloem-feeding	Crop	Late vegetative stage	Short	Medium
190	Macedo et al. (2)	2009	Triticum aestivum	Diuraphis noxia	Photosynthetic rate	umol CO2 m-2 s-1	Photosynthesis	4	4	17.8	21.1	1.4	0.4	-	-	-1.6092	0.845	0.714	Phloem-feeding	Crop	Late vegetative stage	Short	Medium
191	Macedo et al. (2)	2009	Triticum aestivum	Rophalosiphum padi	Pigment content	-	Photosynthesis	4	4	235.9	133.3	12.1	24.1	-	-	2.7013	1.0503	1.1031	Phloem-feeding	Crop	Late vegetative stage	Short	High
192	Macedo et al. (2)	2009	Triticum aestivum	Diuraphis noxia	Pigment content	-	Photosynthesis	4	4	213.9	133.3	29.8	24.1	-	-	1.4931	0.8272	0.6843	Phloem-feeding	Crop	Late vegetative stage	Short	High
193	Macedo et al. (2)	2009	Triticum aestivum	Rophalosiphum padi	Pigment content	-	Photosynthesis	4	4	709.6	243.6	47.9	14.7	-	-	6.5651	2.0156	4.0625	Phloem-feeding	Crop	Late vegetative stage	Short	Medium
194	Macedo et al. (2)	2009	Triticum aestivum	Diuraphis noxia	Pigment content	-	Photosynthesis	4	4	273	243.6	17.9	14.7	-	-	0.8184	0.7452	0.5554	Phloem-feeding	Crop	Late vegetative stage	Short	Medium
195	Macedo et al. (2)	2009	Triticum aestivum	Rophalosiphum padi	Glucose	mg/ml	Carbohydrate content	4	4	0.63	0.4	0.47	0.32	-	-	0.2872	0.7119	0.5068	Phloem-feeding	Crop	Late vegetative stage	Short	High
196	Macedo et al. (2)	2009	Triticum aestivum	Diuraphis noxia	Glucose	mg/ml	Carbohydrate content	4	4	0.23	0.4	0.04	0.32	-	-	-0.3743	0.7152	0.5116	Phloem-feeding	Crop	Late vegetative stage	Short	High
197	Macedo et al. (2)	2009	Triticum aestivum	Rophalosiphum padi	Glucose	mg/ml	Carbohydrate content	4	4	1.19	1.88	0.31	0.83	-	-	-0.5529	0.7248	0.5253	Phloem-feeding	Crop	Late vegetative stage	Short	Medium
198	Macedo et al. (2)	2009	Triticum aestivum	Diuraphis noxia	Glucose	mg/ml	Carbohydrate content	4	4	0.68	1.88	0.15	0.83	-	-	-1.0101	0.7644	0.5843	Phloem-feeding	Crop	Late vegetative stage	Short	Medium
199	Velikova et al	2010	Brassica oleracea	Murgantia histrionica	Photosynthetic rate	umol CO2 m-2 s-1	Photosynthesis	5	5	4.2	8.8	0.7	0.9	-	-	-2.5767	0.8983	0.8069	Cell-content feeder	Crop	Early vegetative stage	Short	Low
200	Velikova et al	2010	Brassica oleracea	Murgantia histrionica	Transpiration	mmol m-2 s-1	Photosynthesis	5	5	1.29	1.57	0.11	0.1	-	-	-1.2029	0.6991	0.4887	Cell-content feeder	Crop	Early vegetative stage	Short	Low
201	Velikova et al	2010	Brassica oleracea	Murgantia histrionica	Stomatal conductance	mol m-2 s-1	Photosynthesis	5	5	0.0975	0.1076	0.0101	0.0082	-	-	-0.4958	0.6443	0.4151	Cell-content feeder	Crop	Early vegetative stage	Short	Low
202	Velikova et al	2010	Brassica oleracea	Murgantia histrionica	Quantum yield	-	Photosynthesis	5	5	0.183	0.294	0.019	0.01	-	-	-3.3018	1.0335	1.0682	Cell-content feeder	Crop	Early vegetative stage	Short	Low
203	Velikova et al	2010	Brassica oleracea	Murgantia histrionica	Quantum yield	-	Photosynthesis	5	5	0.083	0.294	0.017	0.01	-	-	-6.8326	1.8059	3.2612	Cell-content feeder	Crop	Early vegetative stage	Short	Low
204	Velikova et al	2010	Phaseolus vulgaris	Nezara viridula	Photosynthetic rate	umol CO2 m-2 s-1	Photosynthesis	5	5	5.4	11.19	0.98	0.79	-	-	-2.9377	0.9638	0.9289	Phloem-feeding	Crop	Early vegetative stage	Short	Low
205	Velikova et al	2010	Phaseolus vulgaris	Nezara viridula	Transpiration	mmol m-2 s-1	Photosynthesis	5	5	1.05	1.2	0.09	0.06	-	-	-0.8857	0.6694	0.4481	Phloem-feeding	Crop	Early vegetative stage	Short	Low
206	Velikova et al	2010	Phaseolus vulgaris	Nezara viridula	Stomatal conductance	mol m-2 s-1	Photosynthesis	5	5	0.0626	0.0712	0.0061	0.0061	-	-	-0.6367	0.6518	0.4248	Phloem-feeding	Crop	Early vegetative stage	Short	Low
207	Velikova et al	2010	Phaseolus vulgaris	Nezara viridula	Quantum yield	-	Photosynthesis	5	5	0.372	0.392	0.017	0.016	-	-	-0.5472	0.6468	0.4183	Phloem-feeding	Crop	Early vegetative stage	Short	Low
208	Kessler and Baldwin	2004	Nicotiana attenuata	Tupiocoris notatus	Seed production	nº/plant	Reproduction	20	20	126.8	141.4	14.6	19.7	-	-	-0.1893	0.317	0.1005	Cell-content feeder	Crop	Late vegetative stage	Long	Medium
209	Kessler and Baldwin	2004	Nicotiana attenuata	Manduca quinquemaculata	Seed production	nº/plant	Reproduction	15	20	69.2	141.4	8.8	19.7	-	-	-1.0284	0.364	0.1325	Chewing	Crop	Late vegetative stage	Long	Medium
*The presence of an asterisk indicates that standard deviation was provided instead of standard error.

## Sheet: Growth
Study ID	Authors	Year	Plant species	Biotic stress	Parameter	Parameter units	Process	nT	nC	mT	mC	se1T	se1C	T test	ANOVA	g	g.SE	var.g	Feeding guild	Type of plant	Growing stage	Time of infestion	Level of infestation
2	Kleinjan et al.	2004	Asparagus asparagoides	Zygina sp.	Plant biomass	g	Growth	12	12	7.78	14.24	1.18	1.72	-	-	-1.275	0.4506	0.203	Cell-content feeder	Herbaceous	Late vegetative stage	Long	Medium
12	'Roubíčková et al.	2012	Calamagrostis epigejos	Agriotes lineatus	Plant biomass	g (dry weight)	Growth	7	7	0.43	2.05	1.14	0.04	-	-	-0.7451	0.5553	0.3083	Chewing	Herbaceous	Early vegetative stage	Long	Medium
13	Roubíčková et al.	2012	Festuca rubra	Agriotes lineatus	Plant biomass	g (dry weight)	Growth	7	7	4.38	2.15	1.16	0.07	-	-	1.0372	0.5741	0.3296	Chewing	Herbaceous	Early vegetative stage	Long	Medium
21	Park and Lee	2005	Cucumis sativus	Tetranychus urticae	Leaf area	m2	Growth	10	10	0.97	1.22	0.038*	0.069*	-	-	-4.2987	0.8388	0.7036	Cell-content feeder	Crop	Late vegetative stage	Long	High
22	Park and Lee	2005	Cucumis sativus	Tetranychus urticae	Leaf area	m2	Growth	10	10	1.05	1.22	0.05*	0.069*	-	-	-2.4628	0.6044	0.3653	Cell-content feeder	Crop	Late vegetative stage	Long	Medium
23	Park and Lee	2005	Cucumis sativus	Tetranychus urticae	Leaf number	nº/plant	Growth	10	10	21.8	27.5	0.75*	1.05*	-	-	-5.9832	1.0843	1.1757	Cell-content feeder	Crop	Late vegetative stage	Long	High
24	Park and Lee	2005	Cucumis sativus	Tetranychus urticae	Leaf number	nº/plant	Growth	10	10	25.2	27.5	0.75*	1.05*	-	-	-2.4143	0.599	0.3589	Cell-content feeder	Crop	Late vegetative stage	Long	Medium
25	Park and Lee	2005	Cucumis sativus	Tetranychus urticae	Plant biomass	g (dry weight)	Growth	10	10	248	472	26.6*	72.2*	-	-	-3.9431	0.7898	0.6238	Cell-content feeder	Crop	Late vegetative stage	Long	High
26	Park and Lee	2005	Cucumis sativus	Tetranychus urticae	Plant biomass	g (dry weight)	Growth	10	10	306	472	35*	72.2*	-	-	-2.8022	0.6434	0.414	Cell-content feeder	Crop	Late vegetative stage	Long	Medium
27	Park and Lee	2005	Cucumis sativus	Tetranychus urticae	RGR	g/week	Growth	10	10	0.142	0.174	0.0053*	0.008*	-	-	-4.5166	0.8695	0.756	Cell-content feeder	Crop	Late vegetative stage	Long	High
28	Park and Lee	2005	Cucumis sativus	Tetranychus urticae	RGR	g/week	Growth	10	10	0.153	0.174	0.0059*	0.008*	-	-	-2.8614	0.6505	0.4232	Cell-content feeder	Crop	Late vegetative stage	Long	Medium
33	Bownes et al.	2010	Eichhornia crassipes	Cornops aquaticum	Plant biomass	kg	Growth	18	18	0.53	0.7	0.04	0.05	-	-	-0.8904	0.3502	0.1226	Chewing	Herbaceous	Early vegetative stage	Long	Medium
34	Vranjic and Ash	1997	Eucalyptus blakelyi	Eriococcus coriaceus	Leaf area	cm2	Growth	7	10	147.3	369.7	30.4	33.8	-	-	-2.305	0.6452	0.4163	Phloem-feeding	Woody	Late vegetative stage	Long	High
35	Vranjic and Ash	1997	Eucalyptus blakelyi	Eriococcus coriaceus	Leaf area	cm2	Growth	12	10	234.7	369.7	44.4	33.8	-	-	-1.0094	0.4565	0.2084	Phloem-feeding	Woody	Late vegetative stage	Long	Medium
36	Vranjic and Ash	1997	Eucalyptus blakelyi	Eriococcus coriaceus	Plant biomass	g	Growth	7	10	4.01	15.09	0.89	1.73	-	-	-2.4745	0.6654	0.4428	Phloem-feeding	Woody	Late vegetative stage	Long	High
37	Vranjic and Ash	1997	Eucalyptus blakelyi	Eriococcus coriaceus	Plant biomass	g	Growth	12	10	6.59	15.09	1.24	1.73	-	-	-1.7667	0.5099	0.26	Phloem-feeding	Woody	Late vegetative stage	Long	Medium
38	Vranjic and Ash	1997	Eucalyptus blakelyi	Eriococcus coriaceus	RGR	root: shoot (g/g)	Growth	7	10	0.57	0.85	0.05	0.09	-	-	-1.1916	0.5378	0.2892	Phloem-feeding	Woody	Late vegetative stage	Long	High
39	Vranjic and Ash	1997	Eucalyptus blakelyi	Eriococcus coriaceus	RGR	root: shoot (g/g)	Growth	12	10	0.62	0.85	0.07	0.09	-	-	-0.8854	0.4501	0.2026	Phloem-feeding	Woody	Late vegetative stage	Long	Medium
47	Schmidt et al.	2009	Gossypium hirsutum	Spodoptera littoralis	RGR	% day	Growth	16	16	20.65	20	0.52	1.09	-	-	0.1916	0.3544	0.1256	Chewing	Crop	Late vegetative stage	Short	Low
48	Schmidt et al.	2009	Gossypium hirsutum	Tetranychus urticae	RGR	%day	Growth	15	15	27	27.83	2.13	2.17	-	-	-0.1004	0.3654	0.1335	Cell-content feeder	Crop	Late vegetative stage	Short	Low
55	Schmidt et al.	2009	Gossypium hirsutum	Spodoptera littoralis	Water content	% FW	Growth	3	3	38.75	42.5	6	1.5	-	-	-0.4851	0.835	0.6973	Chewing	Crop	Late vegetative stage	Short	Low
56	Schmidt et al.	2009	Gossypium hirsutum	Tetranychus urticae	Water content	% FW	Growth	5	5	42	48.5	0.85	4.42	-	-	-0.9223	0.6724	0.4521	Cell-content feeder	Crop	Late vegetative stage	Short	Low
67	Santamaria et al.	2018	Hordeum vulgare	Tetranychus urticae	Number of leaves	nº/plant	Growth	3	3	6.2	6.5	0.15	0.25	-	-	-0.8232	0.8689	0.7549	Cell-content feeder	Crop	Early vegetative stage	Short	Medium
68	Santamaria et al.	2018	Hordeum vulgare	Tetranychus urticae	Leaf lenght	cm	Growth	3	3	29	28.75	1.15	0.7	-	-	0.1486	0.8183	0.6695	Cell-content feeder	Crop	Early vegetative stage	Short	Medium
69	Santamaria et al.	2018	Hordeum vulgare	Tetranychus urticae	Water content	g	Growth	3	3	0.59	0.54	0.02	0.03	-	-	1.1094	0.9094	0.8269	Cell-content feeder	Crop	Early vegetative stage	Short	Medium
75	Jing et al.	2015	Jacobaea vulgaris	Spodoptera exigua	Plant biomass	g/pot	Growth	5	5	16.35	15.05	0.95	2.1	-	-	0.3602	0.6387	0.408	Chewing	Herbaceous	Early vegetative stage	Long	Low
76	Jing et al.	2015	Jacobaea vulgaris	Agriotes lineatus	Plant biomass	g/pot	Growth	5	5	22.5	15.05	3	2.1	-	-	1.2993	0.7096	0.5035	Chewing	Herbaceous	Early vegetative stage	Long	Low
77	Jing et al.	2015	Leucanthemum vulgare	Spodoptera exigua	Plant biomass	g/pot	Growth	5	5	11.4	13.95	1.05	1	-	-	-1.1232	0.6909	0.4773	Chewing	Herbaceous	Early vegetative stage	Long	Low
78	Jing et al.	2015	Leucanthemum vulgare	Agriotes lineatus	Plant biomass	g/pot	Growth	5	5	13.3	13.95	3.9	1	-	-	-0.1031	0.633	0.4007	Chewing	Herbaceous	Early vegetative stage	Long	Low
79	Harper et al.	1982	Medicago sativa	Acyrthosiphon pisum	Plant height	cm	Growth	8	8	21.33	38.78	1.25	0.61	-	-	-6.3403	1.2866	1.6553	Phloem-feeding	Herbaceous	Early vegetative stage	Long	High
80	Harper et al.	1982	Medicago sativa	Acyrthosiphon pisum	Plant biomass	g	Growth	8	8	21.42	38.06	0.81	2.1	-	-	-3.7361	0.8591	0.738	Phloem-feeding	Herbaceous	Early vegetative stage	Long	High
90	Halitschke et al.	2011	Nicotiana attenuata	Manduca sexta	Leaf area	% area damaged	Growth	7	7	30	0	4.2	0	-	-	3.8607	0.945	0.8931	Chewing	Crop	Late vegetative stage	Short	Low
94	Halitschke et al.	2011	Nicotiana attenuata	Tupiocoris notatus	Leaf area	% area damaged	Growth	7	7	19.3	0	3.7	0	-	-	2.8194	0.7808	0.6096	Cell-content feeder	Crop	Late vegetative stage	Short	Low
98	Preisser et al.	2007	Nicotiana tabacum	Meloidogyne incognita	Plant biomass	g (aboveground)	Growth	30	30	244	237	11.1	9.7	-	-	0.1231	0.2584	0.0668	Gall-forming	Crop	Early vegetative stage	Long	Medium
98	Preisser et al.	2007	Nicotiana tabacum	Meloidogyne incognita	Plant biomass	g (aboveground)	Growth	30	30	235	242	13.8	11.9	-	-	-0.0996	0.2584	0.0668	Gall-forming	Crop	Early vegetative stage	Long	Medium
98	Preisser et al.	2007	Nicotiana tabacum	Meloidogyne incognita	Plant biomass	g (aboveground)	Growth	30	30	250	225	10.7	11.9	-	-	0.4049	0.2609	0.0681	Gall-forming	Crop	Early vegetative stage	Long	Medium
98	Preisser et al.	2007	Nicotiana tabacum	Meloidogyne incognita	Plant biomass	g (aboveground)	Growth	30	30	264	269	8.4	10.3	-	-	-0.0975	0.2584	0.0667	Gall-forming	Crop	Early vegetative stage	Long	Medium
99	Preisser et al.	2007	Nicotiana tabacum	Meloidogyne incognita	Number of leaves	nº/plant	Growth	30	30	7.6	8.6	0.83	1	-	-	-0.1995	0.2589	0.067	Gall-forming	Crop	Early vegetative stage	Long	Medium
99	Preisser et al.	2007	Nicotiana tabacum	Meloidogyne incognita	Number of leaves	nº/plant	Growth	30	30	11.2	10.2	1.03	1.06	-	-	0.1754	0.2587	0.0669	Gall-forming	Crop	Early vegetative stage	Long	Medium
99	Preisser et al.	2007	Nicotiana tabacum	Meloidogyne incognita	Number of leaves	nº/plant	Growth	30	30	8.3	8	1.12	0.82	-	-	0.056	0.2583	0.0667	Gall-forming	Crop	Early vegetative stage	Long	Medium
99	Preisser et al.	2007	Nicotiana tabacum	Meloidogyne incognita	Number of leaves	nº/plant	Growth	30	30	11.3	10.6	0.69	0.7	-	-	0.1846	0.2588	0.067	Gall-forming	Crop	Early vegetative stage	Long	Medium
101	Bufon et al.	2020	Oryza sativa	Schizotetranychus oryzae	Plant height	m	Growth	50	10	1.3	1.32	0.04	0.05	-	-	-0.0748	0.3465	0.12	Cell-content feeder	Crop	Late vegetative stage	Long	Medium
101	Bufon et al.	2020	Oryza sativa	Schizotetranychus oryzae	Plant height	m	Growth	50	10	1.28	1.11	0.03	0.04	-	-	0.8443	0.3551	0.1261	Cell-content feeder	Crop	Late vegetative stage	Long	Medium
101	Bufon et al.	2020	Oryza sativa	Schizotetranychus oryzae	Plant height	m	Growth	50	10	0.81	0.86	0.02	0.03	-	-	-0.3697	0.3481	0.1212	Cell-content feeder	Crop	Late vegetative stage	Long	Medium
101	Bufon et al.	2020	Oryza sativa	Schizotetranychus oryzae	Plant height	m	Growth	50	10	1.21	1.14	0.04	0.04	-	-	0.264	0.3473	0.1206	Cell-content feeder	Crop	Late vegetative stage	Long	Medium
105	Watanabe and Kitagawa	2000	Oryza sativa	Nilaparvata lugens	Leaf area	-	Growth	5	5	-	-	-	-	-	1.07	-0.5909	0.6492	0.4214	Phloem-feeding	Crop	Late vegetative stage	Long	High
106	Watanabe and Kitagawa	2000	Oryza sativa	Nilaparvata lugens	Plant biomass	g	Growth	5	5	5.46	5.75	0.09	0.1	-	-	-1.7244	1.0266	1.0539	Phloem-feeding	Crop	Late vegetative stage	Long	High
109	Kozel et al.	2017	Pinus silvestris	Melolontha melolontha	Plant biomass	g	Growth	21	32	0.74	1.28	0.21	0.26	-	-	-0.418	0.2838	0.0806	Chewing	Woody	Late vegetative stage	Long	High
110	Kozel et al.	2017	Picea abies	Melolontha melolontha	Plant biomass	g	Growth	18	32	1.16	1.43	0.29	0.29	-	-	-0.1796	0.2952	0.0871	Chewing	Woody	Late vegetative stage	Long	High
111	Kozel et al.	2017	Betula pendula	Melolontha melolontha	Plant biomass	g	Growth	23	32	0.51	1.14	0.17	0.25	-	-	-0.5254	0.278	0.0773	Chewing	Woody	Late vegetative stage	Long	High
123	Poveda et al.	2003	Sinapis arvensis	Pieris rapae	Plant height	cm	Growth	24	24	42.84	50.93	3.03	2.4	-	-	-0.6071	0.2955	0.0873	Chewing	Herbaceous	Early vegetative stage	Short	Medium
124	Poveda et al.	2003	Sinapis arvensis	Pieris rapae	Plant biomass	g	Growth	24	24	6.5	8.14	0.58	0.63	-	-	-0.5555	0.2944	0.0867	Chewing	Herbaceous	Early vegetative stage	Short	Medium
135	Haile et al.	1999	Triticum aestivum	Diuraphis noxia	Plant biomass	g (aboveground)	Growth	7	7	0.534	0.538	0.02	0.02	-	-	-0.0764	0.5347	0.286	Phloem-feeding	Crop	Early vegetative stage	Long	Medium
135	Haile et al.	1999	Triticum aestivum	Diuraphis noxia	Plant biomass	g (aboveground)	Growth	7	7	0.385	0.604	0.04	0.06	-	-	-1.6415	0.6289	0.3955	Phloem-feeding	Crop	Early vegetative stage	Long	Medium
135	Haile et al.	1999	Triticum aestivum	Diuraphis noxia	Plant biomass	g (aboveground)	Growth	7	7	0.624	0.718	0.05	0.03	-	-	-0.8713	0.5627	0.3167	Phloem-feeding	Crop	Early vegetative stage	Long	Medium
136	Haile et al.	1999	Triticum aestivum	Diuraphis noxia	Leaf area	cm2	Growth	7	7	10.64	17.05	0.47	1.4	-	-	-2.346	0.7141	0.51	Phloem-feeding	Crop	Early vegetative stage	Long	Medium
136	Haile et al.	1999	Triticum aestivum	Diuraphis noxia	Leaf area	cm2	Growth	7	7	9.84	14.99	0.48	0.88	-	-	-2.2011	0.6951	0.4831	Phloem-feeding	Crop	Early vegetative stage	Long	Medium
136	Haile et al.	1999	Triticum aestivum	Diuraphis noxia	Leaf area	cm2	Growth	7	7	12.93	19.65	1.17	0.97	-	-	-2.3899	0.72	0.5185	Phloem-feeding	Crop	Early vegetative stage	Long	Medium
137	Gianoli and Niemeyer	1997	Triticum uniaristatum	Rhopalosiphum padi	Leaf length	mm	Growth	30	30	0.04	1.43	0.04	0.96	-	-	-0.375	0.2605	0.0679	Phloem-feeding	Crop	Late vegetative stage	Short	Medium
137	Gianoli and Niemeyer	1997	Triticum uniaristatum	Rhopalosiphum padi	Leaf length	mm	Growth	30	30	16.72	13.9	1.75	1.59	-	-	0.3091	0.2598	0.0675	Phloem-feeding	Crop	Late vegetative stage	Short	Medium
138	Liu et al.	2018	Solanum lycopersicum	Tetranychus urticae	Plant biomass	g	Growth	5	5	46.4	50	3.3	2	-	-	-0.5958	0.6494	0.4218	Cell-content feeder	Crop	Early vegetative stage	Long	Low
142	Liu et al.	2018	Solanum lycopersicum	Tetranychus evansi	Plant biomass	g	Growth	5	5	36.1	50	2.8	2	-	-	-2.58	0.8989	0.808	Cell-content feeder	Crop	Early vegetative stage	Long	Low
147	Collins et al.	2001	Salix viminalis	Pterocomma salicis	Plant biomass	g (aboveground)	Growth	13	13	223	288.7	14.83	14.83	-	-	-1.2385	0.4305	0.1853	Phloem-feeding	Woody	Late vegetative stage	Long	Medium
148	Collins et al.	2001	Salix viminalis	Tuberolachnus salignus	Plant biomass	g (aboveground)	Growth	13	13	136.2	288.7	14.83	14.83	-	-	-2.8748	0.5686	0.3233	Phloem-feeding	Woody	Late vegetative stage	Long	Low
161	Donovan et al.	2013	Nicotiana attenuata	Myzus persicae	Plant biomass	g	Growth	12	12	8.8	15.4	0.9	1.5	-	-	-1.5533	0.4697	0.2206	Phloem-feeding	Crop	Early vegetative stage	Long	High
162	Donovan et al.	2013	Nicotiana attenuata	Myzus persicae	Plant biomass	g	Growth	12	12	12.3	15.4	1.2	1.5	-	-	-0.6644	0.4202	0.1765	Phloem-feeding	Crop	Early vegetative stage	Long	Low
165	Donovan et al.	2013	Nicotiana attenuata	Myzus persicae	Branch production	nº/plant	Growth	12	12	19	23	1	1	-	-	-1.1645	0.4438	0.197	Phloem-feeding	Crop	Early vegetative stage	Long	High
166	Donovan et al.	2013	Nicotiana attenuata	Myzus persicae	Branch production	nº/plant	Growth	12	12	21	23	1	1	-	-	-0.5822	0.4174	0.1742	Phloem-feeding	Crop	Early vegetative stage	Long	Low
167	Mundim et al.	2016	Solanum lycocarpum	Spodoptera sp.	Stem size	cm	Growth	10	14	11.15	16.93	2.47	2.02	-	-	-0.7608	0.4294	0.1844	Chewing	Herbaceous	Reproductive stage	Long	Low
168	Mundim et al.	2016	Solanum lycocarpum	Meloidogyne incognita	Stem size	cm	Growth	9	14	14.944	16.93	1.544	2.02	-	-	-0.3023	0.4297	0.1847	Gall-forming	Herbaceous	Reproductive stage	Long	Medium
167	Mundim et al.	2016	Solanum lycocarpum	Spodoptera sp.	Stem size	mm	Growth	10	14	2.19	2.45	0.252	0.187	-	-	-0.3542	0.4174	0.1742	Chewing	Herbaceous	Reproductive stage	Long	Low
168	Mundim et al.	2016	Solanum lycocarpum	Meloidogyne incognita	Stem size	mm	Growth	9	14	2.6	2.45	0.113	0.187	-	-	0.2554	0.429	0.1841	Gall-forming	Herbaceous	Reproductive stage	Long	Medium
169	Mundim et al.	2016	Solanum lycocarpum	Spodoptera sp.	Number of leaves	nº/plant	Growth	10	14	7.3	4.57	0.578	0.358	-	-	1.7712	0.4915	0.2415	Chewing	Herbaceous	Reproductive stage	Long	Low
170	Mundim et al.	2016	Solanum lycocarpum	Meloidogyne incognita	Number of leaves	nº/plant	Growth	9	14	4.444	4.57	0.377	0.358	-	-	-0.1004	0.4275	0.1828	Gall-forming	Herbaceous	Reproductive stage	Long	Medium
171	Mundim et al.	2016	Solanum lycocarpum	Spodoptera sp.	Leaf area	cm2	Growth	10	14	52.852	32.43	4.268	4.58	-	-	1.3053	0.4577	0.2095	Chewing	Herbaceous	Reproductive stage	Long	Low
172	Mundim et al.	2016	Solanum lycocarpum	Meloidogyne incognita	Leaf area	cm2	Growth	9	14	27.687	32.43	4.65	4.58	-	-	-0.2984	0.4297	0.1846	Gall-forming	Herbaceous	Reproductive stage	Long	Medium
173	Mundim et al.	2016	Solanum lycocarpum	Spodoptera sp.	Plant biomass	g (dry weight)	Growth	10	14	0.451	0.977	0.137	0.158	-	-	-0.9943	0.4399	0.1935	Chewing	Herbaceous	Reproductive stage	Long	Low
174	Mundim et al.	2016	Solanum lycocarpum	Meloidogyne incognita	Plant biomass	g (dry weight)	Growth	9	14	0.882	0.997	0.142	0.158	-	-	-0.2164	0.4285	0.1836	Gall-forming	Herbaceous	Reproductive stage	Long	Medium
*The presence of an asterisk indicates that standard deviation was provided instead of standard error.

## Sheet: Photosynthesis
Study ID	Authors	Year	Plant species	Biotic stress	Parameter	Parameter units	Process	nT	nC	mT	mC	se1T	se1C	T test	ANOVA	g	g.SE	var.g	Feeding guild	Type of plant	Growing stage	Time of infestion	Level of infestation
1	Santamaria et al.	2017	Arabidopsis thaliana	Tetranychus urticae	Pigment content	mg g-1 FW	Photosynthesis	6	6	0.781	1.112	0.025	0.031	-	-	-4.8523	1.2185	1.4847	Cell-content feeder	Herbaceous	Late vegetative stage	Short	Medium
9	Heng-Moss et al.	2006	Buchloe dactyloide	Blissus occiduus	Carbon exchange rate	umol CO2 m-2 s-1	Photosynthesis	10	10	5	14.7	2.9	2.3	-	-	-1.1832	0.488	0.2382	Phloem-feeding	Herbaceous	Early vegetative stage	Long	Higjh
10	Heng-Moss et al.	2006	Buchloe dactyloide	Blissus occiduus	Quantum yield	-	Photosynthesis	10	10	-	-	-	-	7.5	-	-3.2124	0.6937	0.4812	Phloem-feeding	Herbaceous	Early vegetative stage	Long	High
11	Heng-Moss et al.	2006	Buchloe dactyloide	Blissus occiduus	Efficiency of PSII	-	Photosynthesis	10	10	138.3	231.8	9.7	8.3	-	-	-2.6701	0.6279	0.3943	Phloem-feeding	Herbaceous	Early vegetative stage	Long	High
14	Aldea et al.	2006	Ulmus alata	Xanthogaleruca lutea	Efficiency of PSII	-	Photosynthesis	5	5	0.55	0.54	0.01	0.01	-	-	0.4516	0.6423	0.4125	Chewing	Woody	-	-	Low
15	Aldea et al.	2006	Liriodendron tulipifera	Unknown leafminer	Efficiency of PSII	-	Photosynthesis	5	5	0.7	0.69	0	0.01	-	-	0.6387	0.6519	0.425	Chewing	Woody	-	-	Low
16	Aldea et al.	2006	Carya glabra	Cecidomyia glutinosa	Efficiency of PSII	-	Photosynthesis	5	5	0.66	0.64	0.01	0.01	-	-	0.9032	0.6708	0.45	Gall-forming	Woody	-	-	Low
17	Aldea et al.	2006	Carya glabra	Caryomyia	Efficiency of PSII	-	Photosynthesis	5	5	0..61	0.6	0.02	0.02	-	-	0.2258	0.6349	0.4031	Gall-forming	Woody	-	-	Low
18	Aldea et al.	2006	Carya glabra	Cecidomyia glutinosa	Efficiency of PSII	-	Photosynthesis	5	5	0.54	0.56	0.02	0.02	-	-	0.4516	0.6423	0.4125	Gall-forming	Woody	-	-	Low
19	Aldea et al.	2006	Quercus velutina	Cynipid waspgall	Efficiency of PSII	-	Photosynthesis	5	5	0.46	0.44	0	0.01	-	-	1.2774	0.7071	0.5	Gall-forming	Woody	-	-	Low
20	Aldea et al.	2006	Ulmus alata	Eryophiydae mite gall	Efficiency of PSII	-	Photosynthesis	5	5	0.61	0.58	0.02	0.03	-	-	0.5314	0.646	0.4173	Gall-forming	Woody	-	-	Low
40	Haile and Higley	2003	Glycine max	Tetranychus urticae	Photosynthetic rate	umol CO2 m-2 s-1	Photosynthesis	8	8	13.66	20.7	1.02	0.67	-	-	-2.9153	0.7397	0.5471	Cell-content feeder	Crop	Reproductive stage	Long	High
41	Haile and Higley	2003	Glycine max	Tetranychus urticae	Stomatal conductance	mmol H20 m-2 s-1	Photosynthesis	8	8	741.71	1245	130.21	116.16	-	-	-1.4576	0.5695	0.3243	Cell-content feeder	Crop	Reproductive stage	Long	High
42	Haile and Higley	2003	Glycine max	Tetranychus urticae	Transpiration	ug H20 cm-2 s-1	Photosynthesis	8	8	20.82	32.72	3.45	4.17	-	-	-1.1112	0.5414	0.2932	Cell-content feeder	Crop	Reproductive stage	Long	High
43	Haile and Higley	2003	Glycine max	Tetranychus urticae	Pigment content	-	Photosynthesis	8	8	46.02	48	1.04	0.57	-	-	-0.8437	0.5243	0.2749	Cell-content feeder	Crop	Reproductive stage	Long	High
44	Haile and Higley	2003	Glycine max	Tetranychus urticae	Quantum yield	-	Photosynthesis	8	8	0.449	0.469	0.039	0.044	-	-	-0.1719	0.501	0.251	Cell-content feeder	Crop	Reproductive stage	Long	High
45	Macedo et al.	2003	Glycine max	Aphis glycines	Photosynthetic rate	umol CO2 m-2 s-1	Photosynthesis	8	8	-	-	-	-	-	7.93	-1.3312	0.5585	0.312	Phloem-feeding	Crop	Early vegetative stage	Long	Low
46	Macedo et al.	2003	Glycine max	Aphis glycines	Quantum yield	-	Photosynthesis	8	8	-	-	-	-	-	1.28	-0.5348	0.5099	0.26	Phloem-feeding	Crop	Early vegetative stage	Long	Low
49	Schmidt et al.	2009	Gossypium hirsutum	Spodoptera littoralis	Photosynthetic rate	ratio day3/day1	Photosynthesis	4	4	1.24	1.18	0.1	0.09	-	-	0.3166	0.7129	0.5083	Chewing	Crop	Late vegetative stage	Short	Low
50	Schmidt et al.	2009	Gossypium hirsutum	Tetranychus urticae	Photosynthetic rate	ratio day5/day1	Photosynthesis	5	5	1.31	1.54	0.19	0.06	-	-	-0.7372	0.6583	0.4333	Cell-content feeder	Crop	Late vegetative stage	Short	Low
51	Schmidt et al.	2009	Gossypium hirsutum	Spodoptera littoralis	Stomatal conductance	ratio day3/day1	Photosynthesis	4	4	1.08	1.11	0.19	0.2	-	-	-0.0772	0.7075	0.5005	Chewing	Crop	Late vegetative stage	Short	Low
52	Schmidt et al.	2009	Gossypium hirsutum	Tetranychus urticae	Stomatal conductance	ratio day5/day1	Photosynthesis	5	5	1	1.57	0.18	0.1	-	-	-1.768	0.7691	0.5916	Cell-content feeder	Crop	Late vegetative stage	Short	Low
53	Schmidt et al.	2009	Gossypium hirsutum	Spodoptera littoralis	Transpiration	ratio day3/day1	Photosynthesis	4	4	1.01	0.98	0.1	0.1	-	-	0.1506	0.7084	0.5019	Chewing	Crop	Late vegetative stage	Short	Low
54	Schmidt et al.	2009	Gossypium hirsutum	Tetranychus urticae	Transpiration	ratio day5/day1	Photosynthesis	5	5	2.75	1.5	1.2	0.07	-	-	0.6642	0.6535	0.427	Cell-content feeder	Crop	Late vegetative stage	Short	Low
70	Santamaria et al.	2018	Hordeum vulgare	Tetranychus urticae	Quantum yield	-	Photosynthesis	3	3	1200	3080	200	120	-	-	-6.4483	2.4659	6.0809	Cell-content feeder	Crop	Early vegetative stage	Short	Medium
71	Santamaria et al.	2018	Hordeum vulgare	Tetranychus urticae	Quantum yield	-	Photosynthesis	3	3	3040	3200	280	40	-	-	-0.4525	0.8327	0.6933	Cell-content feeder	Crop	Early vegetative stage	Short	Medium
72	Santamaria et al.	2018	Hordeum vulgare	Tetranychus urticae	Chlorophyll fluorescence	-	Photosynthesis	3	3	6.5	7.32	0.25	0.23	-	-	-1.9311	1.0734	1.1522	Cell-content feeder	Crop	Early vegetative stage	Short	Medium
73	Santamaria et al.	2018	Hordeum vulgare	Tetranychus urticae	Chlorophyll fluorescence	-	Photosynthesis	3	3	7.47	7.85	0.15	0.25	-	-	-1.0427	0.899	0.8082	Cell-content feeder	Crop	Early vegetative stage	Short	Medium
74	Retuerto et al.	2004	Ilex aquifolium	Coccus sp.	Quantum yield	-	Photosynthesis	7	7	0.18	0.13	0.02	0.005	-	-	1.3109	0.5964	0.3557	Phloem-feeding	Woody	Late vegetative stage	Long	High
82	Lamp et al.	2004	Medicago sativa	Empoasca fabae	Photosynthetic rate	umol CO2 m-2 s-1	Photosynthesis	5	5	3.75	7.35	0.87	0.77	-	-	-1.979	0.8	0.64	Sap-feeding	Herbaceous	Late vegetative stage	Short	Medium
83	Lamp et al.	2004	Medicago sativa	Empoasca fabae	Stomatal conductance	umol cm s-1	Photosynthesis	5	5	3.1	5.45	0.7	0.7	-	-	-1.5161	0.7354	0.5409	Sap-feeding	Herbaceous	Late vegetative stage	Short	Medium
87	Delaney	2012	Nerium oleander	Spodoptera eridania	Photosynthetic rate	-	Photosynthesis	9	9	1.55	8.73	0.29	1.51	-	-	-2.2236	0.6113	0.3736	Chewing	Woody	-	Short	Low
88	Delaney	2012	Nerium oleander	Spodoptera eridania	Stomatal conductance	-	Photosynthesis	9	9	0.028	0.063	0.005	0.013	-	-	-1.1966	0.5158	0.2661	Chewing	Woody	-	Short	Low
89	Delaney	2012	Nerium oleander	Spodoptera eridania	Quantum yield	-	Photosynthesis	9	9	0.37	0.4	0.01	0.03	-	-	-0.4518	0.478	0.2285	Chewing	Woody	-	Short	Low
91	Halitschke et al.	2011	Nicotiana attenuata	Manduca sexta	CO2 assimilation	umol CO2 m-2 s-1	Photosynthesis	7	7	6.8	8.1	0.2	0.1	-	-	-3.1423	0.8295	0.6881	Chewing	Crop	Late vegetative stage	Short	Low
92	Halitschke et al.	2011	Nicotiana attenuata	Manduca sexta	Stomatal conductance	mol m-2 s-1	Photosynthesis	7	7	0.21	0.23	0.01	0.02	-	-	-0.4834	0.5434	0.2952	Chewing	Crop	Late vegetative stage	Short	Low
93	Halitschke et al.	2011	Nicotiana attenuata	Manduca sexta	Efficiency of PSII	-	Photosynthesis	7	7	0.53	0.57	0.01	0.01	-	-	-1.5288	0.6172	0.381	Chewing	Crop	Late vegetative stage	Short	Low
95	Halitschke et al.	2011	Nicotiana attenuata	Tupiocoris notatus	CO2 assimilation	umol CO2 m-2 s-2	Photosynthesis	7	7	8.2	8.1	0.1	0.1	-	-	0.3822	0.5401	0.2917	Cell-content feeder	Crop	Late vegetative stage	Short	Low
96	Halitschke et al.	2011	Nicotiana attenuata	Tupiocoris notatus	Stomatal conductance	mol m-2 s-2	Photosynthesis	7	7	0.24	0.23	0.04	0.02	-	-	0.1209	0.5351	0.2863	Cell-content feeder	Crop	Late vegetative stage	Short	Low
97	Halitschke et al.	2011	Nicotiana attenuata	Tupiocoris notatus	Efficiency of PSII	-	Photosynthesis	7	7	0.59	0.57	0.01	0.01	-	-	0.7644	0.5563	0.3095	Cell-content feeder	Crop	Late vegetative stage	Short	Low
102	Bufon et al.	2020	Oryza sativa	Schizotetranychus oryzae	Pigment content	mg g-1 FW	Photosynthesis	3	3	5.6	11.45	0.4	1.61	-	-	-2.8211	1.305	1.7029	Cell-content feeder	Crop	Late vegetative stage	Long	High
102	Bufon et al.	2020	Oryza sativa	Schizotetranychus oryzae	Pigment content	mg g-1 FW	Photosynthesis	3	3	7.2	9.33	1.3	0.62	-	-	-1.1831	0.9214	0.8489	Cell-content feeder	Crop	Late vegetative stage	Long	High
102	Bufon et al.	2020	Oryza sativa	Schizotetranychus oryzae	Pigment content	mg g-1 FW	Photosynthesis	3	3	11.35	10.75	0.95	1.08	-	-	0.3337	0.8253	0.6812	Cell-content feeder	Crop	Late vegetative stage	Long	High
102	Bufon et al.	2020	Oryza sativa	Schizotetranychus oryzae	Pigment content	mg g-1 FW	Photosynthesis	3	3	6.95	10.15	0.65	1	-	-	-2.1464	1.1254	1.2665	Cell-content feeder	Crop	Late vegetative stage	Long	High
104	Blasi et al.	2017	Oryza sativa	Schizotetranychus oryzae	Pigment content	mg g-1 FW	Photosynthesis	3	3	10.4	14.5	0.1	1.4	-	-	-2.3369	1.1738	1.3777	Cell-content feeder	Crop	Late vegetative stage	Long	High
107	Watanabe and Kitagawa	2000	Oryza sativa	Nilaparvata lugens	Photosynthetic rate	umol CO2 m-2 s-1	Photosynthesis	5	5	11.55	16.74	0.86	0.41	-	-	-4.358	1.7719	3.1396	Phloem-feeding	Crop	Late vegetative stage	Long	High
108	Zangerl et al.	2002	Pastinaca sativa	Trichoplusia ni	Photosynthetic rate	-	Photosynthesis	10	10	-	-	-	-	3.26	-	-0.7733	0.4651	0.2163	Chewing	Crop	Early vegetative stage	Short	Low
133	Haile et al.	1999	Triticum aestivum	Diuraphis noxia	Photosynthetic rate	umol CO2 m-2 s-1	Photosynthesis	7	7	16.43	23.91	1.39	1.22	-	-	-2.186	0.6931	0.4804	Phloem-feeding	Crop	Early vegetative stage	Long	Medium
133	Haile et al.	1999	Triticum aestivum	Diuraphis noxia	Photosynthetic rate	umol CO2 m-2 s-1	Photosynthesis	7	7	17.37	27.34	1.39	1.27	-	-	-2.8621	0.7871	0.6195	Phloem-feeding	Crop	Early vegetative stage	Long	Medium
133	Haile et al.	1999	Triticum aestivum	Diuraphis noxia	Photosynthetic rate	umol CO2 m-2 s-1	Photosynthesis	7	7	20.91	28.34	1.3	1.87	-	-	-1.7633	0.6422	0.4124	Phloem-feeding	Crop	Early vegetative stage	Long	Medium
134	Haile et al.	1999	Triticum aestivum	Diuraphis noxia	Pigment content	-	Photosynthesis	7	7	0.383	0.514	0.02	0.02	-	-	-2.5033	0.7356	0.5411	Phloem-feeding	Crop	Early vegetative stage	Long	Medium
134	Haile et al.	1999	Triticum aestivum	Diuraphis noxia	Pigment content	-	Photosynthesis	7	7	0.33	0.447	0.024	0.04	-	-	-1.3557	0.6005	0.3606	Phloem-feeding	Crop	Early vegetative stage	Long	Medium
134	Haile et al.	1999	Triticum aestivum	Diuraphis noxia	Pigment content	-	Photosynthesis	7	7	0.447	0.574	0.04	0.003	-	-	-1.3475	0.5998	0.3597	Phloem-feeding	Crop	Early vegetative stage	Long	Medium
146	Collins et al.	2001	Salix viminalis	Tuberolachnus salignus	Photosynthetic rate	umol m-2 s-1	Photosynthesis	12	12	8.53	3.9	0.97	0.97	-	-	1.3895	0.4581	0.2098	Phloem-feeding	Woody	Late vegetative stage	Long	Low
146	Collins et al.	2001	Salix viminalis	Tuberolachnus salignus	Photosynthetic rate	umol m-2 s-1	Photosynthesis	12	12	9.87	5.48	0.86	0.86	-	-	1.486	0.4648	0.216	Phloem-feeding	Woody	Late vegetative stage	Long	Low
146	Collins et al.	2001	Salix viminalis	Tuberolachnus salignus	Photosynthetic rate	umol m-2 s-1	Photosynthesis	12	12	9.54	5.41	0.66	0.66	-	-	1.8217	0.4907	0.2408	Phloem-feeding	Woody	Late vegetative stage	Long	Low
149	Donovan et al.	2013	Nicotiana attenuata	Myzus persicae	Photosynthetic rate	umol CO2 m-2 s-1	Photosynthesis	9	9	25.2	27.3	1	0.9	-	-	-0.7433	0.489	0.2391	Phloem-feeding	Crop	Early vegetative stage	Short	High
150	Donovan et al.	2013	Nicotiana attenuata	Myzus persicae	Photosynthetic rate	umol CO2 m-2 s-1	Photosynthesis	9	9	25.2	27.3	1.1	0.9	-	-	-0.7036	0.4872	0.2374	Phloem-feeding	Crop	Early vegetative stage	Short	Low
151	Donovan et al.	2013	Nicotiana attenuata	Myzus persicae	Stomatal conductance	mol H2O m-2 s-1	Photosynthesis	9	9	0.39	0.56	0.02	0.03	-	-	-2.2452	0.6137	0.3766	Phloem-feeding	Crop	Early vegetative stage	Short	High
152	Donovan et al.	2013	Nicotiana attenuata	Myzus persicae	Stomatal conductance	mol H2O m-2 s-1	Photosynthesis	9	9	0.44	0.56	0.03	0.03	-	-	-1.3469	0.527	0.2778	Phloem-feeding	Crop	Early vegetative stage	Short	Low
153	Donovan et al.	2013	Nicotiana attenuata	Myzus persicae	Quantum yield	-	Photosynthesis	9	9	0.466	0.465	0.007	0.008	-	-	0.0448	0.4715	0.2223	Phloem-feeding	Crop	Early vegetative stage	Short	High
154	Donovan et al.	2013	Nicotiana attenuata	Myzus persicae	Quantum yield	-	Photosynthesis	9	9	0.469	0.465	0.01	0.008	-	-	0.1487	0.4721	0.2229	Phloem-feeding	Crop	Early vegetative stage	Short	Low
155	Donovan et al.	2013	Nicotiana attenuata	Myzus persicae	Photosynthetic rate	umol CO2 m-2 s-1	Photosynthesis	9	9	19.5	21.5	1.8	1.3	-	-	-0.4289	0.4773	0.2279	Phloem-feeding	Crop	Early vegetative stage	Long	High
156	Donovan et al.	2013	Nicotiana attenuata	Myzus persicae	Photosynthetic rate	umol CO2 m-2 s-1	Photosynthesis	9	9	22.5	21.5	1.1	1.3	-	-	0.2796	0.4739	0.2246	Phloem-feeding	Crop	Early vegetative stage	Long	Low
157	Donovan et al.	2013	Nicotiana attenuata	Myzus persicae	Stomatal conductance	mol H2O m-2 s-1	Photosynthesis	9	9	0.35	0.31	0.04	0.03	-	-	0.381	0.4761	0.2267	Phloem-feeding	Crop	Early vegetative stage	Long	High
158	Donovan et al.	2013	Nicotiana attenuata	Myzus persicae	Stomatal conductance	mol H2O m-2 s-1	Photosynthesis	9	9	0.32	0.31	0.02	0.03	-	-	0.1321	0.472	0.2228	Phloem-feeding	Crop	Early vegetative stage	Long	Low
159	Donovan et al.	2013	Nicotiana attenuata	Myzus persicae	Quantum yield	-	Photosynthesis	9	9	0.389	0.434	0.023	0.002	-	-	-0.9282	0.4986	0.2486	Phloem-feeding	Crop	Early vegetative stage	Long	High
160	Donovan et al.	2013	Nicotiana attenuata	Myzus persicae	Quantum yield	-	Photosynthesis	9	9	0.435	0.434	0.018	0.002	-	-	0.0263	0.4714	0.2222	Phloem-feeding	Crop	Early vegetative stage	Long	Low
175	Reddall et al.	2004	Gossypium hirsutum	Tetranychus urticae	Photosynthetic rate	umol CO2 m-2s-1	Photosynthesis	4	4	0	9.74	0.77	1.03	-	-	-5.3774	1.7	2.8901	Cell-content feeder	Crop	Late vegetative stage	Long	Medium
176	Reddall et al.	2004	Gossypium hirsutum	Tetranychus urticae	Stomatal conductance	mol H2O m-2s-1	Photosynthesis	4	4	0.08	0.27	0.01	0.04	-	-	-3.2718	1.1768	1.3848	Cell-content feeder	Crop	Late vegetative stage	Long	Medium
177	Reddall et al.	2004	Gossypium hirsutum	Tetranychus urticae	Transpiration	mol H20 m-2 s-1	Photosynthesis	4	4	2.77	5.96	0.34	0.28	-	-	-5.1422	1.6388	2.6856	Cell-content feeder	Crop	Late vegetative stage	Long	Medium
178	Pincebourde et al.	2006	Malus domestica	Phyllonorycter blancardella	Stomatal conductance	mol m-2s-1	Photosynthesis	10	10	0.198	0.348	0.034*	0.034*	-	-	-4.2254	0.8286	0.6866	Leafminer	Woody	Late vegetative stage	Long	-
179	Pincebourde et al.	2006	Malus domestica	Phyllonorycter blancardella	Stomatal conductance	mol m-2s-1	Photosynthesis	10	10	0.134	0.348	0.038*	0.034*	-	-	-5.6845	1.0396	1.0807	Leafminer	Woody	Late vegetative stage	Long	-
180	Pincebourde et al.	2006	Malus domestica	Phyllonorycter blancardella	Transpiration	mmol m-2s-1	Photosynthesis	10	10	2.006	3.073	0.33*	0.35*	-	-	-3.0043	0.6678	0.446	Leafminer	Woody	Late vegetative stage	Long	-
181	Pincebourde et al.	2006	Malus domestica	Phyllonorycter blancardella	Transpiration	mmol m-2s-1	Photosynthesis	10	10	1.427	3.073	0.493*	0.35*	-	-	-3.6874	0.7554	0.5706	Leafminer	Woody	Late vegetative stage	Long	-
182	Tang et al.	2006	Arabidopsis thaliana	Trichoplusia ni	Efficiency of PSII	-	Photosynthesis	8	8	0.74	0.77	0.004	0.004	-	-	-2.6801	0.7079	0.5011	Chewing	Herbaceous	Late vegetative stage	Short	Medium
183	Tang et al.	2006	Arabidopsis thaliana	Trichoplusia ni	Efficiency of PSII	-	Photosynthesis	8	8	0.77	0.78	0.004	0.005	-	-	-0.7893	0.5213	0.2718	Chewing	Herbaceous	Late vegetative stage	Short	Medium
184	Delaney et al.,	2008	Asclepias syriaca	Euchaetes egle	Photosynthetic rate	umol CO2 m-2 s-1	Photosynthesis	4	5	4.68	12.59	0.43	0.57	-	-	-7.1012	1.9989	3.9957	Chewing	Herbaceous	Early vegetative stage	Short	Medium
185	Delaney et al.,	2008	Asclepias syriaca	Danaus plexipus	Photosynthetic rate	umol CO2 m-2 s-1	Photosynthesis	16	16	15.64	22.37	1.76	1.03	-	-	-1.1747	0.3843	0.1477	Chewing	Herbaceous	Early vegetative stage	Short	Medium
186	Delaney et al.,	2008	Asclepias syriaca	Estigmene acrea	Photosynthetic rate	umol CO2 m-2 s-1	Photosynthesis	4	9	12.46	14.84	1.4	1.31	-	-	-0.6504	0.6164	0.3799	Chewing	Herbaceous	Early vegetative stage	Short	Medium
187	Macedo et al. (2)	2009	Triticum aestivum	Rophalosiphum padi	Photosynthetic rate	umol CO2 m-2 s-1	Photosynthesis	4	4	14.4	19.3	1.3	1.9	-	-	-1.5112	0.8299	0.6888	Phloem-feeding	Crop	Late vegetative stage	Long	High
188	Macedo et al. (2)	2009	Triticum aestivum	Diuraphis noxia	Photosynthetic rate	umol CO2 m-2 s-1	Photosynthesis	4	4	15.9	19.3	1	1.9	-	-	-1.1243	0.7775	0.6045	Phloem-feeding	Crop	Late vegetative stage	Long	High
189	Macedo et al. (2)	2009	Triticum aestivum	Rophalosiphum padi	Photosynthetic rate	umol CO2 m-2 s-1	Photosynthesis	4	4	18.1	21.1	1.3	0.4	-	-	-1.566	0.8383	0.7027	Phloem-feeding	Crop	Late vegetative stage	Short	Medium
190	Macedo et al. (2)	2009	Triticum aestivum	Diuraphis noxia	Photosynthetic rate	umol CO2 m-2 s-1	Photosynthesis	4	4	17.8	21.1	1.4	0.4	-	-	-1.6092	0.845	0.714	Phloem-feeding	Crop	Late vegetative stage	Short	Medium
191	Macedo et al. (2)	2009	Triticum aestivum	Rophalosiphum padi	Pigment content	-	Photosynthesis	4	4	235.9	133.3	12.1	24.1	-	-	2.7013	1.0503	1.1031	Phloem-feeding	Crop	Late vegetative stage	Short	High
192	Macedo et al. (2)	2009	Triticum aestivum	Diuraphis noxia	Pigment content	-	Photosynthesis	4	4	213.9	133.3	29.8	24.1	-	-	1.4931	0.8272	0.6843	Phloem-feeding	Crop	Late vegetative stage	Short	High
193	Macedo et al. (2)	2009	Triticum aestivum	Rophalosiphum padi	Pigment content	-	Photosynthesis	4	4	709.6	243.6	47.9	14.7	-	-	6.5651	2.0156	4.0625	Phloem-feeding	Crop	Late vegetative stage	Short	Medium
194	Macedo et al. (2)	2009	Triticum aestivum	Diuraphis noxia	Pigment content	-	Photosynthesis	4	4	273	243.6	17.9	14.7	-	-	0.8184	0.7452	0.5554	Phloem-feeding	Crop	Late vegetative stage	Short	Medium
199	Velikova et al	2010	Brassica oleracea	Murgantia histrionica	Photosynthetic rate	umol CO2 m-2 s-1	Photosynthesis	5	5	4.2	8.8	0.7	0.9	-	-	-2.5767	0.8983	0.8069	Cell-content feeder	Crop	Early vegetative stage	Short	Low
200	Velikova et al	2010	Brassica oleracea	Murgantia histrionica	Transpiration	mmol m-2 s-1	Photosynthesis	5	5	1.29	1.57	0.11	0.1	-	-	-1.2029	0.6991	0.4887	Cell-content feeder	Crop	Early vegetative stage	Short	Low
201	Velikova et al	2010	Brassica oleracea	Murgantia histrionica	Stomatal conductance	mol m-2 s-1	Photosynthesis	5	5	0.0975	0.1076	0.0101	0.0082	-	-	-0.4958	0.6443	0.4151	Cell-content feeder	Crop	Early vegetative stage	Short	Low
202	Velikova et al	2010	Brassica oleracea	Murgantia histrionica	Quantum yield	-	Photosynthesis	5	5	0.183	0.294	0.019	0.01	-	-	-3.3018	1.0335	1.0682	Cell-content feeder	Crop	Early vegetative stage	Short	Low
203	Velikova et al	2010	Brassica oleracea	Murgantia histrionica	Quantum yield	-	Photosynthesis	5	5	0.083	0.294	0.017	0.01	-	-	-6.8326	1.8059	3.2612	Cell-content feeder	Crop	Early vegetative stage	Short	Low
204	Velikova et al	2010	Phaseolus vulgaris	Nezara viridula	Photosynthetic rate	umol CO2 m-2 s-1	Photosynthesis	5	5	5.4	11.19	0.98	0.79	-	-	-2.9377	0.9638	0.9289	Phloem-feeding	Crop	Early vegetative stage	Short	Low
205	Velikova et al	2010	Phaseolus vulgaris	Nezara viridula	Transpiration	mmol m-2 s-1	Photosynthesis	5	5	1.05	1.2	0.09	0.06	-	-	-0.8857	0.6694	0.4481	Phloem-feeding	Crop	Early vegetative stage	Short	Low
206	Velikova et al	2010	Phaseolus vulgaris	Nezara viridula	Stomatal conductance	mol m-2 s-1	Photosynthesis	5	5	0.0626	0.0712	0.0061	0.0061	-	-	-0.6367	0.6518	0.4248	Phloem-feeding	Crop	Early vegetative stage	Short	Low
207	Velikova et al	2010	Phaseolus vulgaris	Nezara viridula	Quantum yield	-	Photosynthesis	5	5	0.372	0.392	0.017	0.016	-	-	-0.5472	0.6468	0.4183	Phloem-feeding	Crop	Early vegetative stage	Short	Low
*The presence of an asterisk indicates that standard deviation was provided instead of standard error.

## Sheet: Reproduction
Study ID	Authors	Year	Plant species	Biotic stress	Parameter	Parameter units	Process	nT	nC	mT	mC	se1T	se1C	T test	ANOVA	g	g.SE	var.g	Feeding guild	Type of plant	Growing stage	Time of infestion	Level of infestation
3	Kleinjan et al.	2005	Asparagus asparagoides	Zygina sp.	Number of flowers	nº/plant	Reproduction	12	12	26.39	65.28	9.72	13.89	-	-	-0.9444	0.432	0.1866	Cell-content feeder	Herbaceous	Late vegetative stage	Long	Medium
4	Kleinjan et al.	2006	Asparagus asparagoides	Zygina sp.	Fruit production	nº/plant	Reproduction	12	12	1.39	20.83	2.78	8.34	-	-	-0.9104	0.4303	0.1852	Cell-content feeder	Herbaceous	Late vegetative stage	Long	Medium
29	Park and Lee	2005	Cucumis sativus	Tetranychus urticae	Fruit production	nº/plant	Reproduction	10	10	13.3	21.2	1.03*	1.83*	-	-	-5.0955	0.9527	0.9076	Cell-content feeder	Crop	Late vegetative stage	Long	High
30	Park and Lee	2005	Cucumis sativus	Tetranychus urticae	Fruit production	nº/plant	Reproduction	10	10	18.8	21.2	2.56*	1.83*	-	-	-1.033	0.4786	0.2291	Cell-content feeder	Crop	Late vegetative stage	Long	Medium
31	Park and Lee	2005	Cucumis sativus	Tetranychus urticae	Fruit weight	total weight/plant	Reproduction	10	10	189	378	22*	59.8*	-	-	-4.0176	0.7999	0.6399	Cell-content feeder	Crop	Late vegetative stage	Long	High
32	Park and Lee	2005	Cucumis sativus	Tetranychus urticae	Fruit weight	total weight/plant	Reproduction	10	10	238	378	30.8*	59.8*	-	-	-2.819	0.6454	0.4166	Cell-content feeder	Crop	Late vegetative stage	Long	Medium
65	Gore et al.	2013	Gossypium hirsutum	Tetranychus urticae	Yield	Lint production (kg/ha)	Reproduction	7	7	875	1254.3	50	31.7	-	-	-3.4629	0.88	0.7744	Cell-content feeder	Crop	Early vegetative stage	Long	High
66	Gore et al.	2013	Gossypium hirsutum	Tetranychus urticae	Yield	Lint production (kg/ha)	Reproduction	7	7	1000	1254.3	50	31.7	-	-	-2.3217	0.7109	0.5054	Cell-content feeder	Crop	Reproductive stage	Long	Higjh
84	Camara et al.	2020	Miconia nervosa	Atta cephalotes Atta sexdens	Number of flowers	Total number	Reproduction	5	5	125	190	41	40	-	-	-0.7248	0.6574	0.4322	Chewing	Woody	Late vegetative stage	-	High
85	Camara et al.	2020	Miconia nervosa	Atta cephalotes Atta sexdens	Fruit set	rate	Reproduction	5	5	0.65	0.48	0.3	0.2	-	-	0.3011	0.6368	0.4056	Chewing	Woody	Late vegetative stage	-	High
86	Camara et al.	2020	Miconia nervosa	Atta cephalotes Atta sexdens	Fruit production	Total number	Reproduction	5	5	95	95	145	50	-	-	0	0	0	Chewing	Woody	Late vegetative stage	-	High
100	Preisser et al.	2007	Nicotiana tabacum	Meloidogyne incognita	Flower production	Total number	Reproduction	30	30	34.9	29	6.4	5.15	-	-	0.1862	0.2588	0.067	Gall-forming	Crop	Early vegetative stage	Long	Medium
100	Preisser et al.	2007	Nicotiana tabacum	Meloidogyne incognita	Flower production	Total number	Reproduction	30	30	28.5	19.8	7.2	7.2	-	-	0.2215	0.259	0.0671	Gall-forming	Crop	Early vegetative stage	Long	Medium
100	Preisser et al.	2007	Nicotiana tabacum	Meloidogyne incognita	Flower production	Total number	Reproduction	30	30	39.3	26.5	6.1	6	-	-	0.3878	0.2607	0.068	Gall-forming	Crop	Early vegetative stage	Long	Medium
100	Preisser et al.	2007	Nicotiana tabacum	Meloidogyne incognita	Flower production	Total number	Reproduction	30	30	20.2	40	7.1	6.4	-	-	-0.5369	0.2629	0.0691	Gall-forming	Crop	Early vegetative stage	Long	Medium
103	Bufon et al.	2020	Oryza sativa	Schizotetranychus oryzae	Seed weight	g	Reproduction	10	10	1.25	1.2	0.25	0.1	-	-	0.0838	0.4474	0.2002	Cell-content feeder	Crop	Late vegetative stage	Long	High
112	Hutchinson et al.	1994	Beta vulgaris	Pemphigus betae	Yield	mt/ha	Reproduction	5	5	-	-	-	-	-	2.17	-0.8415	0.6659	0.4434	Phloem-feeding	Crop	Late vegetative stage	Long	High
112	Hutchinson et al.	1994	Beta vulgaris	Pemphigus betae	Yield	mt/ha	Reproduction	5	5	-	-	-	-	-	4.5	-1.2118	0.7	0.49	Phloem-feeding	Crop	Late vegetative stage	Long	High
112	Hutchinson et al.	1994	Beta vulgaris	Pemphigus betae	Yield	mt/ha	Reproduction	5	5	-	-	-	-	-	3.98	-1.1396	0.6925	0.4796	Phloem-feeding	Crop	Late vegetative stage	Long	High
112	Hutchinson et al.	1994	Beta vulgaris	Pemphigus betae	Yield	mt/ha	Reproduction	5	5	-	-	-	-	-	3.41	-1.0549	0.6843	0.4682	Phloem-feeding	Crop	Late vegetative stage	Long	High
112	Hutchinson et al.	1994	Beta vulgaris	Pemphigus betae	Yield	mt/ha	Reproduction	5	5	-	-	-	-	-	2.5	-0.9032	0.6708	0.45	Phloem-feeding	Crop	Late vegetative stage	Long	High
112	Hutchinson et al.	1994	Beta vulgaris	Pemphigus betae	Yield	mt/ha	Reproduction	4	4	-	-	-	-	-	1.92	-0.852	0.7483	0.56	Phloem-feeding	Crop	Late vegetative stage	Long	High
112	Hutchinson et al.	1994	Beta vulgaris	Pemphigus betae	Yield	mt/ha	Reproduction	4	4	-	-	-	-	-	1.43	-0.7353	0.738	0.5447	Phloem-feeding	Crop	Late vegetative stage	Long	High
112	Hutchinson et al.	1994	Beta vulgaris	Pemphigus betae	Yield	mt/ha	Reproduction	4	4	-	-	-	-	-	4.7	-1.333	0.8043	0.6469	Phloem-feeding	Crop	Late vegetative stage	Long	High
112	Hutchinson et al.	1994	Beta vulgaris	Pemphigus betae	Yield	mt/ha	Reproduction	4	4	-	-	-	-	-	0.41	-0.3937	0.7161	0.5128	Phloem-feeding	Crop	Late vegetative stage	Long	High
112	Hutchinson et al.	1994	Beta vulgaris	Pemphigus betae	Yield	mt/ha	Reproduction	4	4	-	-	-	-	-	3.77	-1.1939	0.786	0.6178	Phloem-feeding	Crop	Late vegetative stage	Long	High
112	Hutchinson et al.	1994	Beta vulgaris	Pemphigus betae	Yield	mt/ha	Reproduction	4	4	-	-	-	-	-	24.2	-3.0248	1.1208	1.2562	Phloem-feeding	Crop	Late vegetative stage	Long	High
113	Peschiutta et al	2020	Prunus avium	Caliroa cerasi	Number of flowers	Nº/branch	Reproduction	19	14	-	-	-	-	-	10.92	1.1355	0.3802	0.1446	Chewing	Woody	Late vegetative stage	Long	Medium
114	Peschiutta et al	2020	Prunus avium	Caliroa cerasi	Fruit production	nº/branch meter	Reproduction	19	14	-	-	-	-	-	0.02	0.0486	0.3523	0.1241	Chewing	Woody	Late vegetative stage	Long	Medium
115	Peschiutta et al	2020	Prunus avium	Caliroa cerasi	Fruit weight	g	Reproduction	19	14	-	-	-	-	-	4.33	-0.715	0.3636	0.1322	Chewing	Woody	Late vegetative stage	Long	Medium
116	Peschiutta et al	2020	Prunus avium	Caliroa cerasi	Fruit quality	SSC(ºBRIX)	Reproduction	19	14	-	-	-	-	-	9.41	-1.0541	0.3765	0.1417	Chewing	Woody	Late vegetative stage	Long	Medium
116	Peschiutta et al	2020	Prunus avium	Caliroa cerasi	Fruit quality	Tritatable acidity (%)	Reproduction	19	14	-	-	-	-	-	10.3	-1.1028	0.3787	0.1434	Chewing	Woody	Late vegetative stage	Long	Medium
117	Peschiutta et al	2020	Prunus avium	Caliroa cerasi	Seed weight	g	Reproduction	19	14	-	-	-	-	-	4.23	-0.7067	0.3633	0.132	Chewing	Woody	Late vegetative stage	Long	Medium
118	Agrawal et al.	1999	Raphanus raphanistrum	Pieris rapae	Days to first flower	days	Reproduction	70	70	36.69	33.55	0.72	0.68	-	-	0.5369	0.1721	0.0296	Chewing	Herbaceous	Early vegetative stage	Short	Medium
119	Agrawal et al.	1999	Raphanus raphanistrum	Pieris rapae	Seed weight	g	Reproduction	70	70	0.003	0.003	0.001	0.001	-	-	0	0	0	Chewing	Herbaceous	Early vegetative stage	Short	Medium
120	Agrawal et al.	1999	Raphanus raphanistrum	Pieris rapae	Seed production	nª/plant	Reproduction	70	70	209.68	340.6	13.66	15.43	-	-	-1.0757	0.181	0.0327	Chewing	Herbaceous	Early vegetative stage	Short	Medium
121	Agrawal et al.	1999	Raphanus raphanistrum	Pieris rapae	Pollen production	nº/plant	Reproduction	70	70	55585	63091	2058	1556	-	-	-0.4926	0.1716	0.0294	Chewing	Herbaceous	Early vegetative stage	Short	Medium
122	Agrawal et al.	1999	Raphanus raphanistrum	Pieris rapae	Pollen size	um3	Reproduction	70	70	4418	4555	35	47	-	-	-0.3959	0.1707	0.0291	Chewing	Herbaceous	Early vegetative stage	Short	Medium
125	Poveda et al.	2003	Sinapis arvensis	Pieris rapae	Days to first flower	days	Reproduction	24	24	32	26.4	0.9	0.7	-	-	-1.4246	0.3243	0.1052	Chewing	Herbaceous	Early vegetative stage	Short	Medium
126	Poveda et al.	2003	Sinapis arvensis	Agriotes sp	Flowering period	days	Reproduction	24	24	40	33	1.7	1.4	-	-	-0.9219	0.3041	0.0925	Chewing	Herbaceous	Early vegetative stage	Long	Medium
127	Poveda et al.	2003	Sinapis arvensis	Agriotes sp	Fruit production	nº/plant	Reproduction	24	24	196.62	147.35	13.52	14.49	-	-	0.7211	0.2982	0.0889	Chewing	Herbaceous	Early vegetative stage	Long	Medium
128	Poveda et al.	2003	Sinapis arvensis	Agriotes sp	Seed production	nº/fruit	Reproduction	20	20	8.45	11.25	0.55	0.3	-	-	-1.2963	0.3185	0.1014	Chewing	Herbaceous	Early vegetative stage	Long	Medium
129	Sanford and Webb	1997	Solanum tuberosum	Empoasca fabae	Yield	% loss of yield	Reproduction	6	6	44	0	6	0	-	-	-4.2812	1.1089	1.2296	Sap-feeding	Crop	Early vegetative stage	Long	High
130	Bardner et al.	1968	Triticum aestivum	Leptohylemyia coarctata larvae	Seed production	nº/ear	Reproduction	4	4	35.7	30.4	1.51	1.51	-	-	1.7621	0.8699	0.7567	Chewing	Crop	Late vegetative stage	Long	High
130	Bardner et al.	1968	Triticum aestivum	Leptohylemyia coarctata larvae	Seed production	nº/ear	Reproduction	4	4	36	30.5	1.38	1.38	-	-	2.1828	0.9454	0.8938	Chewing	Crop	Late vegetative stage	Long	High
131	Bardner et al.	1968	Triticum aestivum	Leptohylemyia coarctata larvae	Seed weight	mg	Reproduction	4	4	33.7	35.2	0.55	0.55	-	-	-1.3692	0.8093	0.655	Chewing	Crop	Late vegetative stage	Long	High
131	Bardner et al.	1968	Triticum aestivum	Leptohylemyia coarctata larvae	Seed weight	mg	Reproduction	4	4	52.6	48.5	0.9	0.9	-	-	2.2871	0.9656	0.9324	Chewing	Crop	Late vegetative stage	Long	High
132	Bardner et al.	1968	Triticum aestivum	Leptohylemyia coarctata larvae	Yield	cwt per acre at 85% dry matter	Reproduction	4	4	30.3	38.7	2.45	2.45	-	-	-1.7213	0.8631	0.7449	Chewing	Crop	Late vegetative stage	Long	High
132	Bardner et al.	1968	Triticum aestivum	Leptohylemyia coarctata larvae	Yield	cwt per acre at 85% dry matter	Reproduction	4	4	40.7	49.3	1.4	1.4	-	-	-3.084	1.1341	1.2861	Chewing	Crop	Late vegetative stage	Long	High
139	Liu et al.	2018	Solanum lycopersicum	Tetranychus urticae	Fruit production	nº/plant	Reproduction	15	15	10.5	16.5	1	0.7	-	-	-1.8076	0.4369	0.1909	Cell-content feeder	Crop	Early vegetative stage	Long	Low
140	Liu et al.	2018	Solanum lycopersicum	Tetranychus urticae	Seed production	nº/plant	Reproduction	15	15	26.7435	27.72	9.975	10.23	-	-	-0.0251	0.3652	0.1333	Cell-content feeder	Crop	Early vegetative stage	Long	Low
141	Liu et al.	2018	Solanum lycopersicum	Tetranychus urticae	Seed production	viable seeds/plant	Reproduction	15	15	20	25	6.5	7.5	-	-	-0.1853	0.366	0.1339	Cell-content feeder	Crop	Early vegetative stage	Long	Low
143	Liu et al.	2018	Solanum lycopersicum	Tetranychus evansi	Fruit production	nº/plant	Reproduction	15	15	7.13	16.5	0.93	0.7	-	-	-2.9603	0.5363	0.2876	Cell-content feeder	Crop	Early vegetative stage	Long	Low
144	Liu et al.	2018	Solanum lycopersicum	Tetranychus evansi	Seed production	nº/plant	Reproduction	15	15	33.1545	27.72	9.0551	10.23	-	-	0.1463	0.3657	0.1337	Cell-content feeder	Crop	Early vegetative stage	Long	Low
145	Liu et al.	2018	Solanum lycopersicum	Tetranychus evansi	Seed production	viable seeds/plant	Reproduction	15	15	30.6	25	9.4	7.5	-	-	0.1713	0.3659	0.1338	Cell-content feeder	Crop	Early vegetative stage	Long	Low
163	Donovan et al.	2013	Nicotiana attenuata	Myzus persicae	Seed weight	mg	Reproduction	12	12	5.3	6.5	0.2	0.2	-	-	-1.7467	0.4846	0.2348	Phloem-feeding	Crop	Early vegetative stage	Long	High
164	Donovan et al.	2013	Nicotiana attenuata	Myzus persicae	Seed weight	mg	Reproduction	12	12	5.9	6.5	0.2	0.2	-	-	-0.8733	0.4286	0.1837	Phloem-feeding	Crop	Early vegetative stage	Long	Low
208	Kessler and Baldwin	2004	Nicotiana attenuata	Tupiocoris notatus	Seed production	nº/plant	Reproduction	20	20	126.8	141.4	14.6	19.7	-	-	-0.1893	0.317	0.1005	Cell-content feeder	Crop	Late vegetative stage	Long	Medium
209	Kessler and Baldwin	2004	Nicotiana attenuata	Manduca quinquemaculata	Seed production	nº/plant	Reproduction	15	20	69.2	141.4	8.8	19.7	-	-	-1.0284	0.364	0.1325	Chewing	Crop	Late vegetative stage	Long	Medium
*The presence of an asterisk indicates that standard deviation was provided instead of standard error.

## Sheet: Carbohydrate_content
Study ID	Authors	Year	Plant species	Biotic stress	Parameter	Parameter units	Process	nT	nC	mT	mC	se1T	se1C	T test	ANOVA	g	g.SE	var.g	Feeding guild	Type of plant	Growing stage	Time of infestion	Level of infestation
5	Sotelo et al.	2014	Brassica rapa	Pieris brassicae	Sucrose	g/100 g Dry weight	Carbohydrate content	10	8	0.17	0.31	0.04	0.05	-	-	-1.0622	0.5095	0.2596	Chewing	Crop	Early vegetative stage	Short	High
6	Sotelo et al.	2014	Brassica rapa	Pieris brassicae	Starch	g/100 g Dry weight	Carbohydrate content	10	10	1.38	1.56	0.31	0.23	-	-	-0.2105	0.4486	0.2012	Chewing	Crop	Early vegetative stage	Short	High
7	Sotelo et al.	2014	Brassica rapa	Brevicoryne brassicae	Glucose	g/100 g Dry weight	Carbohydrate content	10	10	0.83	1.11	0.12	0.2	-	-	-0.542	0.4561	0.208	Phloem-feeding	Crop	Late vegetative stage	Short	Low
8	Sotelo et al.	2014	Brassica rapa	Brevicoryne brassicae	Fructose	g/100 g Dry weight	Carbohydrate content	10	10	0.58	0.66	0.12	0.12	-	-	-0.2128	0.4486	0.2012	Phloem-feeding	Crop	Late vegetative stage	Short	Low
57	Schmidt et al.	2009	Gossypium hirsutum	Spodoptera littoralis	Glucose	umol g-1 FW	Carbohydrate content	6	6	10	10.5	2.25	1.9	-	-	-0.0991	0.5778	0.3338	Chewing	Crop	Late vegetative stage	Short	Low
58	Schmidt et al.	2009	Gossypium hirsutum	Tetranychus urticae	Glucose	umol g-1 FW	Carbohydrate content	6	6	6.7	4.75	1.9	1	-	-	0.5302	0.5891	0.3471	Cell-content feeder	Crop	Late vegetative stage	Short	Low
59	Schmidt et al.	2009	Gossypium hirsutum	Spodoptera littoralis	Fructose	umol g-1 FW	Carbohydrate content	6	6	2.5	2.35	0.1	0.35	-	-	0.2406	0.5798	0.3362	Chewing	Crop	Late vegetative stage	Short	Low
60	Schmidt et al.	2009	Gossypium hirsutum	Tetranychus urticae	Fructose	umol g-1 FW	Carbohydrate content	6	6	1.6	1.75	0.2	0.15	-	-	-0.3503	0.5825	0.3393	Cell-content feeder	Crop	Late vegetative stage	Short	Low
61	Schmidt et al.	2009	Gossypium hirsutum	Spodoptera littoralis	Starch	umol g-1 FW	Carbohydrate content	6	6	0.51	0.43	0.09	0.09	-	-	0.3669	0.583	0.3399	Chewing	Crop	Late vegetative stage	Short	Low
62	Schmidt et al.	2009	Gossypium hirsutum	Tetranychus urticae	Starch	umol g-1 FW	Carbohydrate content	6	6	0.9	0.43	0.3	0.18	-	-	0.7843	0.6028	0.3634	Cell-content feeder	Crop	Late vegetative stage	Short	Low
63	Schmidt et al.	2009	Gossypium hirsutum	Spodoptera littoralis	Sucrose	umol g-1 FW	Carbohydrate content	6	6	4.4	4	0.3	0.35	-	-	0.5066	0.5881	0.3459	Chewing	Crop	Late vegetative stage	Short	Low
64	Schmidt et al.	2009	Gossypium hirsutum	Tetranychus urticae	Sucrose	umol g-1 FW	Carbohydrate content	6	6	4.1	3.5	0.6	0.65	-	-	0.396	0.584	0.341	Cell-content feeder	Crop	Late vegetative stage	Short	Low
81	Harper et al.	1982	Medicago sativa	Acyrthosiphon pisum	Sugar content	%	Carbohydrate content	8	8	7.6	6.85	0.28	0.12	-	-	1.2442	0.5515	0.3041	Phloem-feeding	Herbaceous	Early vegetative stage	Long	High
195	Macedo et al. (2)	2009	Triticum aestivum	Rophalosiphum padi	Glucose	mg/ml	Carbohydrate content	4	4	0.63	0.4	0.47	0.32	-	-	0.2872	0.7119	0.5068	Phloem-feeding	Crop	Late vegetative stage	Short	High
196	Macedo et al. (2)	2009	Triticum aestivum	Diuraphis noxia	Glucose	mg/ml	Carbohydrate content	4	4	0.23	0.4	0.04	0.32	-	-	-0.3743	0.7152	0.5116	Phloem-feeding	Crop	Late vegetative stage	Short	High
197	Macedo et al. (2)	2009	Triticum aestivum	Rophalosiphum padi	Glucose	mg/ml	Carbohydrate content	4	4	1.19	1.88	0.31	0.83	-	-	-0.5529	0.7248	0.5253	Phloem-feeding	Crop	Late vegetative stage	Short	Medium
198	Macedo et al. (2)	2009	Triticum aestivum	Diuraphis noxia	Glucose	mg/ml	Carbohydrate content	4	4	0.68	1.88	0.15	0.83	-	-	-1.0101	0.7644	0.5843	Phloem-feeding	Crop	Late vegetative stage	Short	Medium
